# Supplementary material for: Jaguar interactions with pumas and prey at the northern edge of jaguars’ range
Source: PeerJ. 2017 Jan 18;5:e2886. doi: 10.7717/peerj.2886 (PMC5248577; doi:10.7717/peerj.2886)
Supplement: Data S1 — Information of activity hour and date for each of the five species studied. [file peerj-05-2886-s002.xls]

## Sheet: Hoja1
UTMY(N)	UTMX(E)	long	lat	HOUR	GENUS	JULIAN DAY	DATE
3255508	675052	-109.196	29.4167	1899-12-31 21:18:00	Panthera	2.45158e+06	2000-02-05
3255508	675052	-109.196	29.4167	1899-12-31 03:14:00	Panthera	2.45158e+06	2000-02-09
3251687	679320	-109.196	29.4167	1899-12-31 17:36:00	Panthera	2.45159e+06	2000-02-10
3257190	674808	-109.152	29.3816	1899-12-31 03:55:00	Puma	2.45159e+06	2000-02-13
3251634	679759	-109.148	29.3811	1899-12-31 19:56:00	Panthera	2.45159e+06	2000-02-13
3251634	679759	-109.148	29.3811	1899-12-31 02:28:00	Panthera	2.45159e+06	2000-02-14
3251634	679759	-109.148	29.3811	1899-12-31 02:38:00	Panthera	2.45159e+06	2000-02-14
3255508	675052	-109.148	29.3811	1899-12-31 20:20:00	Panthera	2.45159e+06	2000-02-15
3251634	679759	-109.148	29.3811	1899-12-31 21:45:00	Panthera	2.4516e+06	2000-02-21
3251634	679759	-109.148	29.3811	1899-12-31 22:00:00	Panthera	2.4516e+06	2000-02-21
3251634	679759	-109.148	29.3811	1899-12-31 23:14:00	Panthera	2.4516e+06	2000-02-26
3251634	679759	-109.148	29.3811	1899-12-31 23:24:00	Panthera	2.4516e+06	2000-02-26
3251634	679759	-109.148	29.3811	1899-12-31 23:36:00	Panthera	2.4516e+06	2000-02-26
3251634	679759	-109.148	29.3811	1899-12-31 23:47:00	Panthera	2.4516e+06	2000-02-26
3251634	679759	-109.148	29.3811	1899-12-31 23:57:00	Panthera	2.4516e+06	2000-02-26
3251634	679759	-109.198	29.4319	1899-12-31 12:07:00	Panthera	2.4516e+06	2000-02-27
3257190	674808	-109.198	29.4319	1899-12-31 06:51:00	Puma	2.45161e+06	2000-03-03
3257190	674808	-109.205	29.4915	1899-12-31 06:52:00	Puma	2.45161e+06	2000-03-03
3263785	0674006	-109.205	29.4915	1899-12-31 17:16:00	Panthera	2.45223e+06	2001-11-19
3260544	0675604	-109.201	29.4891	1899-12-31 11:27:00	Puma	2.45223e+06	2001-11-20
3263521	0674410	-109.183	29.478	1899-12-31 15:22:00	Puma	2.45223e+06	2001-11-20
3262323	0676177	-109.201	29.489	1899-12-31 10:01:00	Puma	2.45223e+06	2001-11-21
3263512	0674415	-109.198	29.4658	1899-12-31 11:43:00	Puma	2.45224e+06	2001-11-22
3260696	0675832	-109.172	29.498	1899-12-31 13:06:00	Panthera	2.45224e+06	2001-11-24
3264551	0677181	-109.205	29.4915	1899-12-31 14:20:00	Panthera	2.45224e+06	2001-11-24
3263785	0674006	-109.189	29.4621	1899-12-31 11:00:00	Panthera	2.45224e+06	2001-11-28
3262139	674878	-109.196	29.4765	1899-12-31 07:55:00	Panthera	2.45225e+06	2001-12-03
3262139	674878	-109.196	29.4765	1899-12-31 07:36:00	Panthera	2.45225e+06	2001-12-05
3262182	0674882	-109.185	29.4562	1899-12-31 17:15:00	Panthera	2.45225e+06	2001-12-06
3260090	0675265	-109.173	29.4906	1899-12-31 12:20:00	Puma	2.45225e+06	2001-12-06
3260947	674778	-109.196	29.4765	1899-12-31 21:10:00	Panthera	2.45225e+06	2001-12-07
3262139	674878	-109.196	29.4769	1899-12-31 01:17:00	Panthera	2.45225e+06	2001-12-08
3259905	0676024	-109.193	29.458	1899-12-31 11:00:00	Panthera	2.45226e+06	2001-12-19
3264800	673771	-109.217	29.5134	1899-12-31 10:50:00	Puma	2.45263e+06	2002-12-22
3261356	674822	-109.19	29.4884	1899-12-31 04:28:00	Panthera	2.45263e+06	2002-12-22
3266196	672778	-109.18	29.473	1899-12-31 17:13:00	Puma	2.45263e+06	2002-12-24
3261768	676516	-109.197	29.4695	1899-12-31 22:13:00	Panthera	2.45263e+06	2002-12-25
3266196	672778	-109.217	29.5134	1899-12-31 18:18:00	Puma	2.45264e+06	2003-01-03
3263118	673185	-109.217	29.5134	1899-12-31 17:39:00	Puma	2.45265e+06	2003-01-12
3266196	672778	-109.2	29.4701	1899-12-31 08:41:00	Puma	2.45266e+06	2003-01-18
3266932	672579	-109.197	29.4665	1899-12-31 22:51:00	Panthera	2.45352e+06	2005-06-02
3261099	674413	-109.219	29.5201	1899-12-31 18:43:00	Puma	2.45353e+06	2005-06-03
3266932	672579	-109.209	29.4898	1899-12-31 19:03:00	Puma	2.45353e+06	2005-06-04
3263589	673656	-109.159	29.4981	1899-12-31 03:57:00	Puma	2.45353e+06	2005-06-04
3264588	678417	-109.169	29.4988	1899-12-31 01:40:00	Puma	2.45353e+06	2005-06-07
3264650	677474	-109.169	29.4988	1899-12-31 02:38:00	Puma	2.45353e+06	2005-06-07
3264650	677474	-109.208	29.4888	1899-12-31 17:42:00	Puma	2.45353e+06	2005-06-12
3264650	677474	-109.201	29.4672	1899-12-31 18:32:00	Panthera	2.45355e+06	2005-06-26
3261099	674413	-109.201	29.4672	1899-12-31 08:38:00	Panthera	2.45355e+06	2005-06-29
3261099	674413	-109.201	29.4672	1899-12-31 09:35:00	Panthera	2.45355e+06	2005-06-29
3261099	674413	-109.201	29.4672	1899-12-31 01:26:00	Panthera	2.45354e+06	2005-06-29
3266932	672579	-109.212	29.4829	1899-12-31 10:20:00	Puma	2.45355e+06	2005-06-30
3264588	678417	-109.159	29.4981	1899-12-31 08:05:00	Puma	2.45377e+06	2006-01-31
3264650	677474	-109.169	29.4988	1899-12-31 08:40:00	Puma	2.45377e+06	2006-01-31
3262822	673304	-109.159	29.4981	1899-12-31 04:08:00	Panthera	2.45377e+06	2006-02-08
3260988	674862	-109.159	29.4981	1899-12-31 05:55:00	Puma	2.45378e+06	2006-02-10
3264588	678417	-109.197	29.4662	1899-12-31 22:27:00	Panthera	2.45378e+06	2006-02-11
3264588	678417	-109.212	29.4829	1899-12-31 13:36:00	Puma	2.45378e+06	2006-02-16
3262822	673304	-109.159	29.4981	1899-12-31 18:44:00	Puma	2.45379e+06	2006-02-19
3262389		-109.201	29.489	1899-12-31 13:00:00	Puma	2.45379e+06	2006-02-19
3264588	678417	-109.159	29.4981	1899-12-31 15:56:00	Puma	2.45379e+06	2006-02-21
3260988	674862	-109.197	29.4662	1899-12-31 17:32:00	Puma	2.45379e+06	2006-02-22
3264588	678417	-109.159	29.4981	1899-12-31 21:15:00	Puma	2.45379e+06	2006-02-23
3264959	673304	-109.212	29.5022	1899-12-31 21:47:00	Puma	2.45417e+06	2007-03-10
3264959	673304	-109.212	29.5022	1899-12-31 01:34:00	Puma	2.45417e+06	2007-03-12
3264959	673304	-109.212	29.5022	1899-12-31 01:35:00	Puma	2.45417e+06	2007-03-14
3264959	673756	-109.207	29.5021	1899-12-31 00:20:00	Panthera	2.45419e+06	2007-03-27
3261889	675937	-109.185	29.4741	1899-12-31 21:17:00	Puma	2.45475e+06	2008-10-08
3261889	675937	-109.185	29.4741	1899-12-31 12:47:00	Panthera	2.45475e+06	2008-10-14
3259167	677763	-109.167	29.4493	1899-12-31 08:54:00	Puma	2.45476e+06	2008-10-25
3259167	677763	-109.167	29.4493	1899-12-31 16:40:00	Puma	2.45477e+06	2008-10-28
3259167	677763	-109.167	29.4493	1899-12-31 03:13:00	Puma	2.45477e+06	2008-10-31
3254229	679821	-109.147	29.4045	1899-12-31 18:16:00	Puma	2.45492e+06	2009-04-01
3265250	673723	-109.208	29.5048	1899-12-31 14:40:00	Puma	2.45493e+06	2009-04-05
3265250	673723	-109.208	29.5048	1899-12-31 15:44:00	Puma	2.45493e+06	2009-04-05
3261923	675948	-109.185	29.4744	1899-12-31 07:37:00	Panthera	2.45493e+06	2009-04-08
3261332	675290	-109.192	29.4692	1899-12-31 06:57:00	Panthera	2.45493e+06	2009-04-09
3263574	675336	-109.191	29.4894	1899-12-31 01:21:00	Puma	2.45489e+06	2009-03-02
3249397	684480	-109.1	29.3602	1899-12-31 21:33:00	Puma	2.45489e+06	2009-03-03
3249397	684480	-109.1	29.3602	1899-12-31 03:36:00	Puma	2.4549e+06	2009-03-07
3249397	684480	-109.1	29.3602	1899-12-31 05:16:00	Panthera	2.4549e+06	2009-03-08
3261332	675290	-109.192	29.4692	1899-12-31 12:04:00	Puma	2.4549e+06	2009-03-12
3261332	675290	-109.192	29.4692	1899-12-31 12:11:00	Puma	2.4549e+06	2009-03-12
3261332	675290	-109.192	29.4692	1899-12-31 13:24:00	Puma	2.4549e+06	2009-03-12
3261889	675937	-109.185	29.4741	1899-12-31 20:06:00	Panthera	2.4549e+06	2009-03-13
3254229	679821	-109.147	29.4045	1899-12-31 11:12:00	Panthera	2.45491e+06	2009-03-15
3254229	679821	-109.147	29.4045	1899-12-31 18:01:00	Puma	2.45491e+06	2009-03-16
3263198	676085	-109.184	29.4859	1899-12-31 06:18:00	Puma	2.45491e+06	2009-03-18
3264998	677143	-109.173	29.502	1899-12-31 04:54:00	Puma	2.45491e+06	2009-03-18
3264998	677143	-109.173	29.502	1899-12-31 05:19:00	Puma	2.45491e+06	2009-03-18
3254285	682184	-109.122	29.4047	1899-12-31 04:02:00	Puma	2.45491e+06	2009-03-19
3249397	684480	-109.1	29.3602	1899-12-31 19:05:00	Puma	2.45491e+06	2009-03-19
3249082	685515	-109.089	29.3572	1899-12-31 23:59:00	Puma	2.45491e+06	2009-03-21
3249397	684480	-109.1	29.3602	1899-12-31 19:00:00	Puma	2.45491e+06	2009-03-21
3249475	684243	-109.102	29.361	1899-12-31 09:30:00	Puma	2.45491e+06	2009-03-23
3249475	684243	-109.102	29.361	1899-12-31 09:38:00	Puma	2.45491e+06	2009-03-23
3265250	673723	-109.208	29.5048	1899-12-31 23:25:00	Panthera	2.45492e+06	2009-03-24
3263198	676085	-109.184	29.4859	1899-12-31 06:05:00	Puma	2.45491e+06	2009-03-24
3246593	685477	-109.09	29.3348	1899-12-31 00:57:00	Panthera	2.45491e+06	2009-03-24
3239101	685307	-109.093	29.2672	1899-12-31 19:37:00	Puma	2.45492e+06	2009-03-24
3265250	673723	-109.208	29.5048	1899-12-31 19:00:00	Puma	2.45492e+06	2009-03-27
3263966	674000	-109.205	29.4931	1899-12-31 17:44:00	Puma	2.45529e+06	2010-04-01
3242554	684924	-109.096	29.2984	1899-12-31 17:33:00	Puma	2.45529e+06	2010-04-02
3238966	686360	-109.082	29.2659	1899-12-31 19:23:00	Puma	2.45529e+06	2010-04-03
3261925	675942	-109.185	29.4745	1899-12-31 19:06:00	Puma	2.45529e+06	2010-04-05
3256191	676743	-109.178	29.4226	1899-12-31 17:40:00	Puma	2.45529e+06	2010-04-05
3257393	678080	-109.164	29.4333	1899-12-31 14:21:00	Puma	2.45529e+06	2010-04-05
3264897	673743	-109.208	29.5016	1899-12-31 06:27:00	Puma	2.45529e+06	2010-04-06
3261180	675034	-109.195	29.4679	1899-12-31 03:06:00	Puma	2.45529e+06	2010-04-06
3265427	673639	-109.209	29.5064	1899-12-31 06:40:00	Puma	2.45529e+06	2010-04-06
3260040	675116	-109.194	29.4576	1899-12-31 02:19:00	Puma	2.45529e+06	2010-04-06
3260040	675116	-109.194	29.4576	1899-12-31 21:17:00	Panthera	2.4553e+06	2010-04-09
3261837	675929	-109.186	29.4737	1899-12-31 01:18:00	Puma	2.4553e+06	2010-04-10
3242554	684924	-109.096	29.2984	1899-12-31 18:41:00	Puma	2.4553e+06	2010-04-10
3261925	675942	-109.185	29.4745	1899-12-31 01:20:00	Puma	2.4553e+06	2010-04-10
3261180	675034	-109.195	29.4679	1899-12-31 05:30:00	Puma	2.4553e+06	2010-04-15
3263966	674000	-109.205	29.4931	1899-12-31 17:29:00	Puma	2.4553e+06	2010-04-16
3261180	675034	-109.195	29.4679	1899-12-31 14:28:00	Puma	2.4553e+06	2010-04-16
3257393	678080	-109.164	29.4333	1899-12-31 23:00:00	Panthera	2.4553e+06	2010-04-17
3242554	684924	-109.096	29.2984	1899-12-31 03:48:00	Puma	2.4553e+06	2010-04-17
3246341	685858	-109.086	29.3325	1899-12-31 20:23:00	Puma	2.4553e+06	2010-04-17
3264897	673743	-109.208	29.5016	1899-12-31 19:12:00	Panthera	2.45531e+06	2010-04-19
3265427	673639	-109.209	29.5064	1899-12-31 18:56:00	Panthera	2.45531e+06	2010-04-19
3258164	678758	-109.157	29.4401	1899-12-31 19:13:00	Puma	2.45531e+06	2010-04-19
3257393	678080	-109.164	29.4333	1899-12-31 07:20:00	Puma	2.45531e+06	2010-04-19
3258481	680899	-109.135	29.4427	1899-12-31 20:48:00	Puma	2.45531e+06	2010-04-19
3261180	675034	-109.195	29.4679	1899-12-31 02:53:00	Panthera	2.45531e+06	2010-04-20
3260572	677094	-109.174	29.4621	1899-12-31 05:55:00	Panthera	2.45531e+06	2010-04-20
3263505	673450	-109.211	29.4891	1899-12-31 06:47:00	Panthera	2.45531e+06	2010-04-22
3253608	680197	-109.143	29.3988	1899-12-31 05:15:00	Puma	2.45531e+06	2010-04-22
3258889	679692	-109.147	29.4465	1899-12-31 19:03:00	Puma	2.45531e+06	2010-04-23
3242554	684924	-109.096	29.2984	1899-12-31 00:32:00	Puma	2.45531e+06	2010-04-24
3263505	673450	-109.211	29.4891	1899-12-31 00:25:00	Panthera	2.45531e+06	2010-04-25
3257393	678080	-109.164	29.4333	1899-12-31 07:58:00	Puma	2.45531e+06	2010-04-25
3258164	678758	-109.157	29.4401	1899-12-31 07:13:00	Puma	2.45531e+06	2010-04-25
3247099	669579	-109.253	29.3416	1899-12-31 21:32:00	Puma	2.45531e+06	2010-04-25
3243501	686656	-109.078	29.3067	1899-12-31 17:10:00	Puma	2.45531e+06	2010-04-26
3255147	684809	-109.095	29.412	1899-12-31 06:41:00	Puma	2.45531e+06	2010-04-27
3252186	678977	-109.156	29.3862	1899-12-31 01:06:00	Puma	2.45531e+06	2010-04-27
3254220	679827	-109.147	29.4044	1899-12-31 06:16:00	Puma	2.45531e+06	2010-04-27
3255597	679086	-109.154	29.4169	1899-12-31 00:42:00	Puma	2.45531e+06	2010-04-28
3255597	679086	-109.154	29.4169	1899-12-31 23:33:00	Puma	2.45532e+06	2010-04-28
3258481	680899	-109.135	29.4427	1899-12-31 15:15:00	Puma	2.45532e+06	2010-04-30
3264513	676552	-109.179	29.4977	1899-12-31 14:47:00	Puma	2.45532e+06	2010-04-30
3255597	679086	-109.154	29.4169	1899-12-31 03:16:00	Puma	2.45532e+06	2010-04-30
3255597	679086	-109.154	29.4169	1899-12-31 18:31:00	Puma	2.45532e+06	2010-04-30
3254675	680401	-109.141	29.4084	1899-12-31 06:21:00	Puma	2.45532e+06	2010-05-01
3260355	680880	-109.135	29.4596	1899-12-31 19:24:00	Puma	2.45532e+06	2010-05-01
3243027	692843	-109.015	29.3015	1899-12-31 20:31:00	Puma	2.45532e+06	2010-05-01
3243042	692840	-109.015	29.3016	1899-12-31 20:31:00	Puma	2.45532e+06	2010-05-01
3259168	677765	-109.167	29.4493	1899-12-31 07:04:00	Puma	2.45532e+06	2010-05-02
3255597	679086	-109.154	29.4169	1899-12-31 03:02:00	Puma	2.45532e+06	2010-05-02
3263455	674824	-109.197	29.4884	1899-12-31 19:52:00	Puma	2.45532e+06	2010-05-03
3260040	675116	-109.194	29.4576	1899-12-31 17:36:00	Puma	2.45532e+06	2010-05-03
3262877	674486	-109.2	29.4833	1899-12-31 19:32:00	Puma	2.45532e+06	2010-05-03
3263476	675089	-109.194	29.4886	1899-12-31 19:12:00	Puma	2.45532e+06	2010-05-03
3265427	673639	-109.209	29.5064	1899-12-31 21:20:00	Puma	2.45532e+06	2010-05-03
3252186	678977	-109.156	29.3862	1899-12-31 09:19:00	Puma	2.45532e+06	2010-05-03
3254675	680401	-109.141	29.4084	1899-12-31 02:42:00	Puma	2.45532e+06	2010-05-03
3254220	679827	-109.147	29.4044	1899-12-31 02:11:00	Puma	2.45532e+06	2010-05-03
3253197	681326	-109.131	29.395	1899-12-31 07:14:00	Puma	2.45532e+06	2010-05-04
3260908	675676	-109.188	29.4653	1899-12-31 21:08:00	Puma	2.45532e+06	2010-05-04
3260572	677094	-109.174	29.4621	1899-12-31 16:26:00	Puma	2.45532e+06	2010-05-04
3254220	679827	-109.147	29.4044	1899-12-31 18:47:00	Puma	2.45532e+06	2010-05-04
3263966	674000	-109.205	29.4931	1899-12-31 18:37:00	Puma	2.45532e+06	2010-05-05
3251819	679896	-109.146	29.3827	1899-12-31 20:51:00	Puma	2.45532e+06	2010-05-06
3252186	678977	-109.156	29.3862	1899-12-31 19:37:00	Puma	2.45532e+06	2010-05-06
3260040	675116	-109.194	29.4576	1899-12-31 17:53:00	Puma	2.45532e+06	2010-05-06
3261837	675929	-109.186	29.4737	1899-12-31 06:05:00	Puma	2.45532e+06	2010-05-07
3254675	680401	-109.141	29.4084	1899-12-31 18:38:00	Puma	2.45532e+06	2010-05-07
3255092	682099	-109.123	29.4119	1899-12-31 19:19:00	Puma	2.45533e+06	2010-05-08
3261158	675135	-109.194	29.4677	1899-12-31 04:31:00	Puma	2.45532e+06	2010-05-08
3254675	680401	-109.141	29.4084	1899-12-31 03:11:00	Puma	2.45532e+06	2010-05-08
3254220	679827	-109.147	29.4044	1899-12-31 02:44:00	Puma	2.45532e+06	2010-05-08
3252638	686085	-109.082	29.3892	1899-12-31 02:03:00	Panthera	2.45533e+06	2010-05-09
3263455	674824	-109.197	29.4884	1899-12-31 02:00:00	Panthera	2.45533e+06	2010-05-09
3258481	680899	-109.135	29.4427	1899-12-31 20:57:00	Puma	2.45533e+06	2010-05-09
3255597	679086	-109.154	29.4169	1899-12-31 07:40:00	Puma	2.45533e+06	2010-05-09
3255597	679086	-109.154	29.4169	1899-12-31 19:38:00	Puma	2.45533e+06	2010-05-09
3248669	681739	-109.128	29.3541	1899-12-31 07:14:00	Puma	2.45565e+06	2011-04-01
3260040	675116	-109.194	29.4576	1899-12-31 09:57:00	Puma	2.45565e+06	2011-04-01
3266694	672871	-109.216	29.5179	1899-12-31 01:41:00	Panthera	2.45565e+06	2011-04-02
3265427	673639	-109.209	29.5064	1899-12-31 19:45:00	Panthera	2.45565e+06	2011-04-02
3263455	674824	-109.197	29.4884	1899-12-31 14:49:00	Puma	2.45565e+06	2011-04-02
3245889	684739	-109.097	29.3285	1899-12-31 06:01:00	Puma	2.45565e+06	2011-04-03
3258164	678758	-109.157	29.4401	1899-12-31 00:24:00	Puma	2.45565e+06	2011-04-03
3258164	678758	-109.157	29.4401	1899-12-31 19:25:00	Puma	2.45566e+06	2011-04-03
3239156	688787	-109.057	29.2672	1899-12-31 02:38:00	Puma	2.45565e+06	2011-04-03
3238777	686425	-109.081	29.2641	1899-12-31 03:08:00	Puma	2.45565e+06	2011-04-03
3263966	674000	-109.205	29.4931	1899-12-31 20:55:00	Puma	2.45566e+06	2011-04-04
3239502	683718	-109.109	29.2711	1899-12-31 22:06:00	Puma	2.45566e+06	2011-04-05
3256191	676743	-109.178	29.4226	1899-12-31 15:01:00	Panthera	2.45566e+06	2011-04-06
3257393	678080	-109.164	29.4333	1899-12-31 10:49:00	Puma	2.45566e+06	2011-04-06
3258164	678758	-109.157	29.4401	1899-12-31 09:13:00	Puma	2.45566e+06	2011-04-06
3254220	679827	-109.147	29.4044	1899-12-31 16:49:00	Puma	2.45566e+06	2011-04-06
3258481	680899	-109.135	29.4427	1899-12-31 19:11:00	Puma	2.45566e+06	2011-04-07
3251991	685365	-109.09	29.3835	1899-12-31 19:14:00	Puma	2.45566e+06	2011-04-07
3249326	685866	-109.085	29.3594	1899-12-31 01:41:00	Puma	2.45566e+06	2011-04-07
3257542	677369	-109.171	29.4347	1899-12-31 09:48:00	Puma	2.45566e+06	2011-04-08
3258164	678758	-109.157	29.4401	1899-12-31 06:40:00	Puma	2.45566e+06	2011-04-08
3264167	674609	-109.199	29.4949	1899-12-31 08:52:00	Puma	2.45566e+06	2011-04-08
3264167	674609	-109.199	29.4949	1899-12-31 08:59:00	Puma	2.45566e+06	2011-04-08
3264167	674609	-109.199	29.4949	1899-12-31 09:06:00	Puma	2.45566e+06	2011-04-08
3248945	684755	-109.097	29.3561	1899-12-31 21:33:00	Puma	2.45566e+06	2011-04-08
3251819	679896	-109.146	29.3827	1899-12-31 13:38:00	Panthera	2.45566e+06	2011-04-09
3260040	675116	-109.194	29.4576	1899-12-31 05:25:00	Panthera	2.45566e+06	2011-04-09
3261158	675135	-109.194	29.4677	1899-12-31 04:39:00	Panthera	2.45566e+06	2011-04-09
3263642	677029	-109.174	29.4898	1899-12-31 19:27:00	Panthera	2.45566e+06	2011-04-10
3258481	680899	-109.135	29.4427	1899-12-31 18:55:00	Puma	2.45566e+06	2011-04-10
3254675	680401	-109.141	29.4084	1899-12-31 18:38:00	Puma	2.45566e+06	2011-04-10
3265427	673639	-109.209	29.5064	1899-12-31 21:13:00	Panthera	2.45566e+06	2011-04-11
3264167	674609	-109.199	29.4949	1899-12-31 21:56:00	Panthera	2.45566e+06	2011-04-11
3242554	684924	-109.096	29.2984	1899-12-31 22:49:00	Puma	2.45566e+06	2011-04-11
3266694	672871	-109.216	29.5179	1899-12-31 20:17:00	Panthera	2.45566e+06	2011-04-12
3257393	678080	-109.164	29.4333	1899-12-31 00:57:00	Panthera	2.45566e+06	2011-04-13
3256191	676743	-109.178	29.4226	1899-12-31 00:51:00	Panthera	2.45566e+06	2011-04-13
3256191	676743	-109.178	29.4226	1899-12-31 01:52:00	Panthera	2.45566e+06	2011-04-13
3238904	685364	-109.092	29.2654	1899-12-31 07:48:00	Puma	2.45566e+06	2011-04-13
3238904	685364	-109.092	29.2654	1899-12-31 05:24:00	Puma	2.45566e+06	2011-04-13
3251317	679746	-109.148	29.3782	1899-12-31 22:32:00	Panthera	2.45567e+06	2011-04-14
3254220	679827	-109.147	29.4044	1899-12-31 14:44:00	Panthera	2.45567e+06	2011-04-14
3260355	680880	-109.135	29.4596	1899-12-31 23:41:00	Panthera	2.45567e+06	2011-04-15
3256191	676743	-109.178	29.4226	1899-12-31 06:47:00	Panthera	2.45567e+06	2011-04-15
3256191	676743	-109.178	29.4226	1899-12-31 07:48:00	Panthera	2.45567e+06	2011-04-15
3263966	674000	-109.205	29.4931	1899-12-31 20:09:00	Puma	2.45567e+06	2011-04-15
3254675	680401	-109.141	29.4084	1899-12-31 17:09:00	Puma	2.45567e+06	2011-04-15
3254220	679827	-109.147	29.4044	1899-12-31 07:15:00	Puma	2.45567e+06	2011-04-16
3242554	684924	-109.096	29.2984	1899-12-31 06:50:00	Puma	2.45567e+06	2011-04-16
3258164	678758	-109.157	29.4401	1899-12-31 19:58:00	Puma	2.45567e+06	2011-04-17
3246140	678157	-109.165	29.3318	1899-12-31 06:28:00	Puma	2.45567e+06	2011-04-17
3243347	678682	-109.16	29.3065	1899-12-31 02:45:00	Puma	2.45567e+06	2011-04-17
3253031	680570	-109.139	29.3936	1899-12-31 08:43:00	Puma	2.45567e+06	2011-04-18
3253608	680197	-109.143	29.3988	1899-12-31 09:03:00	Puma	2.45567e+06	2011-04-18
3251819	679896	-109.146	29.3827	1899-12-31 06:40:00	Puma	2.45567e+06	2011-04-18
3251317	679746	-109.148	29.3782	1899-12-31 06:30:00	Puma	2.45567e+06	2011-04-18
3244801	684682	-109.098	29.3187	1899-12-31 22:44:00	Puma	2.45567e+06	2011-04-18
3261158	675135	-109.194	29.4677	1899-12-31 09:19:00	Puma	2.45567e+06	2011-04-18
3261158	675135	-109.194	29.4677	1899-12-31 09:42:00	Puma	2.45567e+06	2011-04-18
3257393	678080	-109.164	29.4333	1899-12-31 20:36:00	Puma	2.45567e+06	2011-04-19
3258164	678758	-109.157	29.4401	1899-12-31 21:11:00	Puma	2.45567e+06	2011-04-19
3244801	684682	-109.098	29.3187	1899-12-31 05:31:00	Puma	2.45567e+06	2011-04-19
3242554	684924	-109.096	29.2984	1899-12-31 20:44:00	Puma	2.45567e+06	2011-04-21
3260355	680880	-109.135	29.4596	1899-12-31 23:20:00	Puma	2.45567e+06	2011-04-22
3251317	679746	-109.148	29.3782	1899-12-31 08:14:00	Puma	2.45567e+06	2011-04-23
3257393	678080	-109.164	29.4333	1899-12-31 06:18:00	Panthera	2.45568e+06	2011-04-24
3248669	681739	-109.128	29.3541	1899-12-31 21:43:00	Panthera	2.45568e+06	2011-04-26
3258164	678758	-109.157	29.4401	1899-12-31 19:37:00	Puma	2.45568e+06	2011-04-26
3251993	681222	-109.133	29.3841	1899-12-31 22:21:00	Panthera	2.45568e+06	2011-04-27
3248669	681739	-109.128	29.3541	1899-12-31 19:51:00	Panthera	2.45568e+06	2011-04-27
3252725	682953	-109.115	29.3905	1899-12-31 01:19:00	Panthera	2.45568e+06	2011-04-27
3266694	672871	-109.216	29.5179	1899-12-31 18:59:00	Puma	2.45568e+06	2011-04-27
3264167	674609	-109.199	29.4949	1899-12-31 07:10:00	Puma	2.45568e+06	2011-04-27
3264167	674609	-109.199	29.4949	1899-12-31 07:15:00	Puma	2.45568e+06	2011-04-27
3241821	687714	-109.067	29.2914	1899-12-31 13:53:00	Puma	2.45568e+06	2011-04-27
3266694	672871	-109.216	29.5179	1899-12-31 21:35:00	Puma	2.45568e+06	2011-04-28
3266694	672871	-109.216	29.5179	1899-12-31 01:03:00	Puma	2.45568e+06	2011-04-29
3266694	672871	-109.216	29.5179	1899-12-31 18:16:00	Puma	2.45568e+06	2011-04-29
3266694	672871	-109.216	29.5179	1899-12-31 22:18:00	Puma	2.45568e+06	2011-04-29
3239156	688787	-109.057	29.2672	1899-12-31 17:31:00	Puma	2.45568e+06	2011-04-29
3243347	678682	-109.16	29.3065	1899-12-31 23:52:00	Panthera	2.45568e+06	2011-04-30
3248669	681739	-109.128	29.3541	1899-12-31 20:29:00	Panthera	2.45568e+06	2011-04-30
3243347	678682	-109.16	29.3065	1899-12-31 18:19:00	Puma	2.45568e+06	2011-04-30
3251991	685365	-109.09	29.3835	1899-12-31 01:40:00	Panthera	2.45568e+06	2011-05-01
3266694	672871	-109.216	29.5179	1899-12-31 23:00:00	Panthera	2.45568e+06	2011-05-01
3263966	674000	-109.205	29.4931	1899-12-31 21:35:00	Panthera	2.45568e+06	2011-05-01
3265427	673639	-109.209	29.5064	1899-12-31 22:21:00	Panthera	2.45568e+06	2011-05-01
3262226	675980	-109.185	29.4772	1899-12-31 20:07:00	Panthera	2.45568e+06	2011-05-01
3265427	673639	-109.209	29.5064	1899-12-31 22:20:00	Panthera	2.45568e+06	2011-05-01
3259168	677765	-109.167	29.4493	1899-12-31 00:12:00	Puma	2.45568e+06	2011-05-01
3265427	673639	-109.209	29.5064	1899-12-31 11:18:00	Panthera	2.45598e+06	2012-02-27
3245545	686985	-109.074	29.3251	1899-12-31 11:55:00	Puma	2.45598e+06	2012-02-27
3260040	675116	-109.194	29.4576	1899-12-31 07:07:00	Puma	2.45598e+06	2012-02-27
3262226	675980	-109.185	29.4772	1899-12-31 04:13:00	Puma	2.45599e+06	2012-02-28
3261158	675135	-109.194	29.4677	1899-12-31	Panthera	2.45599e+06	2012-02-29
3262226	675980	-109.185	29.4772	1899-12-31 01:21:00	Panthera	2.45599e+06	2012-02-29
3265427	673639	-109.209	29.5064	1899-12-31 03:31:00	Panthera	2.45599e+06	2012-02-29
3266694	672871	-109.216	29.5179	1899-12-31 04:13:00	Panthera	2.45599e+06	2012-02-29
3240135	686775	-109.077	29.2763	1899-12-31 03:52:00	Puma	2.45599e+06	2012-02-29
3242851	692902	-109.014	29.2999	1899-12-31 08:46:00	Puma	2.45599e+06	2012-03-01
3251993	681222	-109.133	29.3841	1899-12-31 22:27:00	Puma	2.45599e+06	2012-03-01
3254675	680401	-109.141	29.4084	1899-12-31 22:11:00	Puma	2.45599e+06	2012-03-02
3254675	680401	-109.141	29.4084	1899-12-31 21:58:00	Panthera	2.45599e+06	2012-03-03
3246140	678157	-109.165	29.3318	1899-12-31 17:33:00	Puma	2.45599e+06	2012-03-03
3257393	678080	-109.164	29.4333	1899-12-31 09:40:00	Puma	2.45599e+06	2012-03-03
3243340	678140	-109.166	29.3065	1899-12-31 20:00:00	Panthera	2.45599e+06	2012-03-04
3246140	678157	-109.165	29.3318	1899-12-31 21:25:00	Puma	2.45599e+06	2012-03-04
3251993	681222	-109.133	29.3841	1899-12-31 18:30:00	Puma	2.45599e+06	2012-03-04
3252002	680745	-109.138	29.3843	1899-12-31 16:44:00	Puma	2.45599e+06	2012-03-04
3252002	680745	-109.138	29.3843	1899-12-31 19:00:00	Puma	2.45599e+06	2012-03-04
3257393	678080	-109.164	29.4333	1899-12-31 04:52:00	Panthera	2.45599e+06	2012-03-05
3262226	675980	-109.185	29.4772	1899-12-31 23:46:00	Panthera	2.45599e+06	2012-03-05
3260572	677094	-109.174	29.4621	1899-12-31 21:31:00	Panthera	2.45599e+06	2012-03-05
3266694	672871	-109.216	29.5179	1899-12-31 02:43:00	Panthera	2.45599e+06	2012-03-06
3265427	673639	-109.209	29.5064	1899-12-31 02:08:00	Panthera	2.45599e+06	2012-03-06
3260572	677094	-109.174	29.4621	1899-12-31 17:15:00	Puma	2.45599e+06	2012-03-06
3240970	692074	-109.023	29.2831	1899-12-31 15:47:00	Puma	2.45599e+06	2012-03-07
3245889	684739	-109.097	29.3285	1899-12-31 00:07:00	Puma	2.45599e+06	2012-03-07
3249542	683310	-109.112	29.3617	1899-12-31 16:35:00	Puma	2.45599e+06	2012-03-07
3248442	684827	-109.096	29.3516	1899-12-31 01:27:00	Puma	2.45599e+06	2012-03-08
3242851	692902	-109.014	29.2999	1899-12-31 23:45:00	Puma	2.456e+06	2012-03-08
3251819	679896	-109.146	29.3827	1899-12-31 15:17:00	Puma	2.456e+06	2012-03-08
3266694	672871	-109.216	29.5179	1899-12-31 21:27:00	Panthera	2.456e+06	2012-03-10
3243340	678140	-109.166	29.3065	1899-12-31 20:16:00	Panthera	2.456e+06	2012-03-10
3256183	681570	-109.128	29.4219	1899-12-31 21:06:00	Puma	2.456e+06	2012-03-10
3254675	680401	-109.141	29.4084	1899-12-31 18:37:00	Puma	2.456e+06	2012-03-10
3251841	682833	-109.116	29.3825	1899-12-31 05:15:00	Puma	2.456e+06	2012-03-10
3265427	673639	-109.209	29.5064	1899-12-31 21:35:00	Puma	2.456e+06	2012-03-11
3245889	684739	-109.097	29.3285	1899-12-31 23:39:00	Puma	2.456e+06	2012-03-12
3266694	672871	-109.216	29.5179	1899-12-31 06:45:00	Puma	2.456e+06	2012-03-12
3257393	678080	-109.164	29.4333	1899-12-31 01:52:00	Panthera	2.456e+06	2012-03-13
3249542	683310	-109.112	29.3617	1899-12-31 19:31:00	Puma	2.456e+06	2012-03-14
3266694	672871	-109.216	29.5179	1899-12-31 11:51:00	Puma	2.456e+06	2012-03-16
3265427	673639	-109.209	29.5064	1899-12-31 18:14:00	Puma	2.456e+06	2012-03-16
3262226	675980	-109.185	29.4772	1899-12-31 15:47:00	Puma	2.45601e+06	2012-03-18
3263642	677029	-109.174	29.4898	1899-12-31 23:25:00	Puma	2.45601e+06	2012-03-18
3260572	677094	-109.174	29.4621	1899-12-31 23:03:00	Puma	2.45601e+06	2012-03-18
3259459	676603	-109.179	29.4521	1899-12-31 14:24:00	Puma	2.45601e+06	2012-03-19
3263642	677029	-109.174	29.4898	1899-12-31 03:24:00	Puma	2.45601e+06	2012-03-19
3265427	673639	-109.209	29.5064	1899-12-31 14:35:00	Puma	2.45601e+06	2012-03-19
3260572	677094	-109.174	29.4621	1899-12-31 06:07:00	Puma	2.45601e+06	2012-03-19
3264403	674878	-109.196	29.497	1899-12-31 23:24:00	Panthera	2.45601e+06	2012-03-20
3258402	679707	-109.147	29.4421	1899-12-31 20:07:00	Panthera	2.45601e+06	2012-03-20
3257393	678080	-109.164	29.4333	1899-12-31 20:33:00	Puma	2.45601e+06	2012-03-20
3263642	677029	-109.174	29.4898	1899-12-31 22:23:00	Puma	2.45601e+06	2012-03-20
3258481	680899	-109.135	29.4427	1899-12-31 12:13:00	Puma	2.45601e+06	2012-03-20
3246726	682057	-109.125	29.3365	1899-12-31 07:22:00	Puma	2.45601e+06	2012-03-20
3266694	672871	-109.216	29.5179	1899-12-31 01:39:00	Panthera	2.45601e+06	2012-03-21
3266694	672871	-109.216	29.5179	1899-12-31 04:05:00	Panthera	2.45601e+06	2012-03-21
3265427	673639	-109.209	29.5064	1899-12-31 00:57:00	Panthera	2.45601e+06	2012-03-21
3258402	679707	-109.147	29.4421	1899-12-31 01:02:00	Panthera	2.45601e+06	2012-03-21
3263642	677029	-109.174	29.4898	1899-12-31 08:13:00	Puma	2.45601e+06	2012-03-21
3251841	682833	-109.116	29.3825	1899-12-31 19:03:00	Puma	2.45601e+06	2012-03-22
3253197	681326	-109.131	29.395	1899-12-31 07:32:00	Puma	2.45601e+06	2012-03-22
3246726	682057	-109.125	29.3365	1899-12-31 22:02:00	Puma	2.45601e+06	2012-03-23
3260355	680880	-109.135	29.4596	1899-12-31 08:22:00	Puma	2.45601e+06	2012-03-23
3253608	680197	-109.143	29.3988	1899-12-31 14:28:00	Puma	2.45601e+06	2012-03-23
3260355	680880	-109.135	29.4596	1899-12-31 04:32:00	Panthera	2.45601e+06	2012-03-24
3255618	681998	-109.124	29.4167	1899-12-31 01:17:00	Puma	2.45601e+06	2012-03-24
3246726	682057	-109.125	29.3365	1899-12-31 03:41:00	Puma	2.45601e+06	2012-03-24
3253197	681326	-109.131	29.395	1899-12-31 22:06:00	Puma	2.45601e+06	2012-03-24
3260355	680880	-109.135	29.4596	1899-12-31 14:29:00	Puma	2.45601e+06	2012-03-24
3257393	678080	-109.164	29.4333	1899-12-31 05:40:00	Panthera	2.45601e+06	2012-03-26
3260355	680880	-109.135	29.4596	1899-12-31 02:57:00	Panthera	2.45601e+06	2012-03-26
3239011	687530	-109.07	29.2661	1899-12-31 19:52:00	Panthera	2.45601e+06	2012-03-26
3263061	673181	-109.214	29.4851	1899-12-31 22:32:00	Panthera	2.45601e+06	2012-03-27
3266694	672871	-109.216	29.5179	1899-12-31 01:03:00	Panthera	2.45601e+06	2012-03-28
3265427	673639	-109.209	29.5064	1899-12-31 00:24:00	Panthera	2.45601e+06	2012-03-28
3248442	684827	-109.096	29.3516	1899-12-31 18:00:00	Puma	2.45602e+06	2012-03-28
3251819	679896	-109.146	29.3827	1899-12-31 17:24:00	Puma	2.45602e+06	2012-03-28
3263642	677029	-109.174	29.4898	1899-12-31 09:59:00	Puma	2.45601e+06	2012-03-28
3250047	684164	-109.103	29.3661	1899-12-31 08:58:00	Puma	2.45601e+06	2012-03-28
3242851	692902	-109.014	29.2999	1899-12-31 05:44:00	Puma	2.45602e+06	2012-03-29
3266694	672871	-109.216	29.5179	1899-12-31 02:35:00	Puma	2.45602e+06	2012-03-29
3260572	677094	-109.174	29.4621	1899-12-31 10:48:00	Puma	2.45602e+06	2012-03-30
3259459	676603	-109.179	29.4521	1899-12-31 19:47:00	Puma	2.45602e+06	2012-03-31
3249542	683310	-109.112	29.3617	1899-12-31 00:02:00	Puma	2.45602e+06	2012-03-31
3262226	675980	-109.185	29.4772	1899-12-31 03:40:00	Puma	2.45602e+06	2012-03-31
				1899-12-31 14:16:00	Odocoileus	2.41502e+06	2009-04-01
				1899-12-31 22:50:00	Odocoileus	2.41502e+06	2009-04-01
				1899-12-31 09:34:00	Odocoileus	2.41502e+06	2009-04-02
				1899-12-31 09:27:00	Odocoileus	2.41502e+06	2009-04-02
				1899-12-31 19:59:00	Odocoileus	2.41502e+06	2009-04-02
				1899-12-31 23:13:00	Odocoileus	2.41502e+06	2009-04-02
				1899-12-31 10:38:00	Odocoileus	2.41502e+06	2009-04-03
				1899-12-31 08:29:00	Odocoileus	2.41502e+06	2009-04-03
				1899-12-31 19:56:00	Odocoileus	2.41502e+06	2009-04-04
				1899-12-31 14:28:00	Odocoileus	2.41502e+06	2009-04-04
				1899-12-31 08:38:00	Odocoileus	2.41502e+06	2009-04-05
				1899-12-31 08:12:00	Odocoileus	2.41502e+06	2009-04-06
				1899-12-31 14:07:00	Odocoileus	2.41502e+06	2009-04-06
				1899-12-31 22:53:00	Odocoileus	2.41502e+06	2009-04-07
				1900-01-08 06:43:12	Odocoileus	2.41503e+06	2009-04-07
				1899-12-31 10:55:00	Odocoileus	2.41502e+06	2009-04-07
				1899-12-31 11:19:00	Odocoileus	2.41502e+06	2009-04-07
				1899-12-31 20:04:00	Pecari	2.41502e+06	2009-04-07
				1899-12-31 08:44:00	Odocoileus	2.41502e+06	2009-04-08
				1899-12-31 10:08:00	Odocoileus	2.41502e+06	2009-03-09
				1899-12-31 11:08:00	Odocoileus	2.41502e+06	2009-03-11
				1899-12-31 11:08:00	Odocoileus	2.41502e+06	2009-03-11
				1899-12-31 11:38:00	Odocoileus	2.41502e+06	2009-03-11
				1899-12-31 15:22:00	Odocoileus	2.41502e+06	2009-03-11
				1899-12-31 17:06:00	Odocoileus	2.41502e+06	2009-03-12
				1899-12-31 07:30:00	Pecari	2.41502e+06	2009-03-12
				1899-12-31 03:02:00	Odocoileus	2.41502e+06	2009-03-13
				1899-12-31 10:03:00	Odocoileus	2.41502e+06	2009-03-13
				1899-12-31 16:49:00	Odocoileus	2.41502e+06	2009-03-13
				1899-12-31 14:48:00	Odocoileus	2.41502e+06	2009-03-15
				1899-12-31 09:26:00	Odocoileus	2.41502e+06	2009-03-15
				1899-12-31 13:34:00	Odocoileus	2.41502e+06	2009-03-16
				1899-12-31 12:59:00	Odocoileus	2.41502e+06	2009-03-16
				1899-12-31 07:56:00	Odocoileus	2.41502e+06	2009-03-17
				1899-12-31 09:25:00	Odocoileus	2.41502e+06	2009-03-17
				1899-12-31 15:41:00	Odocoileus	2.41502e+06	2009-03-18
				1899-12-31 09:13:00	Odocoileus	2.41502e+06	2009-03-19
				1899-12-31 14:03:00	Odocoileus	2.41502e+06	2009-03-19
				1899-12-31 07:31:00	Odocoileus	2.41502e+06	2009-03-19
				1899-12-31 15:32:00	Odocoileus	2.41502e+06	2009-03-19
				1899-12-31 17:47:00	Odocoileus	2.41502e+06	2009-03-19
				1899-12-31 17:51:00	Odocoileus	2.41502e+06	2009-03-20
				1899-12-31 08:35:00	Odocoileus	2.41502e+06	2009-03-20
				1899-12-31 07:06:00	Odocoileus	2.41502e+06	2009-03-21
				1899-12-31 08:44:00	Odocoileus	2.41502e+06	2009-03-21
				1899-12-31 15:41:00	Odocoileus	2.41502e+06	2009-03-21
				1899-12-31 03:43:00	Odocoileus	2.41502e+06	2009-03-21
				1899-12-31 01:49:00	Odocoileus	2.41502e+06	2009-03-21
				1899-12-31 09:34:00	Odocoileus	2.41502e+06	2009-03-21
				1899-12-31 10:22:00	Odocoileus	2.41502e+06	2009-03-23
				1899-12-31 08:14:00	Odocoileus	2.41502e+06	2009-03-23
				1899-12-31 10:50:00	Odocoileus	2.41502e+06	2009-03-24
				1899-12-31 08:09:00	Odocoileus	2.41502e+06	2009-03-24
				1899-12-31 09:26:00	Odocoileus	2.41502e+06	2009-03-24
				1899-12-31 12:00:00	Odocoileus	2415019	2009-03-24
				1899-12-31 10:21:00	Odocoileus	2.41502e+06	2009-03-26
				1899-12-31 15:32:00	Odocoileus	2.41502e+06	2009-03-26
				1900-01-23 10:04:48	Odocoileus	2.41504e+06	2009-03-26
				1899-12-31 01:03:00	Odocoileus	2.41502e+06	2009-03-27
				1899-12-31 08:42:00	Odocoileus	2.41502e+06	2009-03-27
				1899-12-31 14:45:00	Odocoileus	2.41502e+06	2009-03-27
				1899-12-31 09:25:00	Odocoileus	2.41502e+06	2009-03-28
				1899-12-31 14:54:00	Odocoileus	2.41502e+06	2009-03-28
				1899-12-31 15:40:00	Odocoileus	2.41502e+06	2009-03-29
				1899-12-31 15:40:00	Odocoileus	2.41502e+06	2009-03-29
				1899-12-31 18:49:00	Pecari	2.41502e+06	2009-03-30
				1899-12-31 12:28:00	Odocoileus	2.41502e+06	2009-03-31
				1899-12-31 22:47:00	Odocoileus	2.41502e+06	2009-03-31
				1899-12-31 09:12:00	Odocoileus	2.41502e+06	2009-03-31
				1899-12-31 19:37:00	Odocoileus	2.41502e+06	2010-04-09
				1899-12-31 03:07:00	Odocoileus	2.41502e+06	2010-04-09
				1899-12-31 07:40:00	Pecari	2.41502e+06	2010-04-09
				1899-12-31 08:11:00	Odocoileus	2.41502e+06	2010-04-10
				1899-12-31 19:26:00	Odocoileus	2.41502e+06	2010-04-10
				1899-12-31 19:28:00	Odocoileus	2.41502e+06	2010-04-10
				1899-12-31 16:07:00	Odocoileus	2.41502e+06	2010-04-10
				1899-12-31 16:17:00	Odocoileus	2.41502e+06	2010-04-10
				1899-12-31 16:17:00	Odocoileus	2.41502e+06	2010-04-10
				1899-12-31 16:17:00	Odocoileus	2.41502e+06	2010-04-10
				1899-12-31 16:17:00	Odocoileus	2.41502e+06	2010-04-10
				1899-12-31 07:50:00	Odocoileus	2.41502e+06	2010-04-11
				1899-12-31 06:50:00	Odocoileus	2.41502e+06	2010-04-11
				1899-12-31 06:58:00	Odocoileus	2.41502e+06	2010-04-11
				1899-12-31 19:24:00	Odocoileus	2.41502e+06	2010-04-11
				1899-12-31 06:32:00	Odocoileus	2.41502e+06	2010-04-12
				1899-12-31 02:44:00	Odocoileus	2.41502e+06	2010-04-12
				1899-12-31 18:08:00	Odocoileus	2.41502e+06	2010-04-12
				1899-12-31 19:44:00	Odocoileus	2.41502e+06	2010-04-12
				1899-12-31 06:48:00	Odocoileus	2.41502e+06	2010-04-12
				1899-12-31 23:46:00	Odocoileus	2.41502e+06	2010-04-12
				1899-12-31 10:59:00	Odocoileus	2.41502e+06	2010-04-12
				1899-12-31 15:43:00	Odocoileus	2.41502e+06	2010-04-12
				1899-12-31 18:13:00	Pecari	2.41502e+06	2010-04-12
				1899-12-31 19:24:00	Odocoileus	2.41502e+06	2010-04-13
				1899-12-31 07:27:00	Odocoileus	2.41502e+06	2010-04-13
				1899-12-31 06:35:00	Odocoileus	2.41502e+06	2010-04-13
				1899-12-31 18:53:00	Odocoileus	2.41502e+06	2010-04-13
				1899-12-31 18:16:00	Odocoileus	2.41502e+06	2010-04-13
				1899-12-31 19:00:00	Odocoileus	2.41502e+06	2010-04-14
				1899-12-31 07:45:00	Odocoileus	2.41502e+06	2010-04-14
				1899-12-31 02:18:00	Odocoileus	2.41502e+06	2010-04-14
				1899-12-31 05:24:00	Odocoileus	2.41502e+06	2010-04-14
				1899-12-31 08:38:00	Odocoileus	2.41502e+06	2010-04-14
				1899-12-31 13:49:00	Odocoileus	2.41502e+06	2010-04-15
				1899-12-31 07:52:00	Odocoileus	2.41502e+06	2010-04-15
				1899-12-31 14:00:00	Odocoileus	2.41502e+06	2010-04-15
				1899-12-31 11:04:00	Odocoileus	2.41502e+06	2010-04-16
				1899-12-31 10:27:00	Odocoileus	2.41502e+06	2010-04-16
				1899-12-31 12:03:00	Odocoileus	2.41502e+06	2010-04-16
				1899-12-31 08:29:00	Pecari	2.41502e+06	2010-04-16
				1899-12-31 07:33:00	Odocoileus	2.41502e+06	2010-04-16
				1899-12-31 07:42:00	Odocoileus	2.41502e+06	2010-04-16
				1899-12-31 05:09:00	Odocoileus	2.41502e+06	2010-04-16
				1899-12-31 09:18:00	Odocoileus	2.41502e+06	2010-04-16
				1899-12-31 08:31:00	Odocoileus	2.41502e+06	2010-04-17
				1899-12-31 08:31:00	Odocoileus	2.41502e+06	2010-04-17
				1899-12-31 18:31:00	Odocoileus	2.41502e+06	2010-04-17
				1899-12-31 21:57:00	Odocoileus	2.41502e+06	2010-04-17
				1899-12-31 08:16:00	Odocoileus	2.41502e+06	2010-04-17
				1899-12-31 08:16:00	Odocoileus	2.41502e+06	2010-04-17
				1899-12-31 06:26:00	Odocoileus	2.41502e+06	2010-04-17
				1899-12-31 07:05:00	Odocoileus	2.41502e+06	2010-04-18
				1899-12-31 15:42:00	Odocoileus	2.41502e+06	2010-04-18
				1899-12-31 15:42:00	Odocoileus	2.41502e+06	2010-04-18
				1899-12-31 07:39:00	Odocoileus	2.41502e+06	2010-04-18
				1899-12-31 13:24:00	Odocoileus	2.41502e+06	2010-04-18
				1899-12-31 07:28:00	Odocoileus	2.41502e+06	2010-04-18
				1899-12-31 07:38:00	Odocoileus	2.41502e+06	2010-04-18
				1899-12-31 07:44:00	Odocoileus	2.41502e+06	2010-04-18
				1899-12-31 20:17:00	Odocoileus	2.41502e+06	2010-04-18
				1899-12-31 19:24:00	Odocoileus	2.41502e+06	2010-04-19
				1899-12-31 15:42:00	Odocoileus	2.41502e+06	2010-04-19
				1899-12-31 14:27:00	Odocoileus	2.41502e+06	2010-04-19
				1899-12-31 14:27:00	Odocoileus	2.41502e+06	2010-04-19
				1899-12-31 23:38:00	Odocoileus	2.41502e+06	2010-04-19
				1899-12-31 19:21:00	Odocoileus	2.41502e+06	2010-04-19
				1899-12-31 08:15:00	Odocoileus	2.41502e+06	2010-04-19
				1899-12-31 13:45:00	Odocoileus	2.41502e+06	2010-04-19
				1899-12-31 06:31:00	Odocoileus	2.41502e+06	2010-04-20
				1899-12-31 16:46:00	Odocoileus	2.41502e+06	2010-04-20
				1899-12-31 05:52:00	Odocoileus	2.41502e+06	2010-04-20
				1899-12-31 07:16:00	Odocoileus	2.41502e+06	2010-04-21
				1899-12-31 04:56:00	Odocoileus	2.41502e+06	2010-04-21
				1899-12-31 10:40:00	Odocoileus	2.41502e+06	2010-04-21
				1899-12-31 08:39:00	Odocoileus	2.41502e+06	2010-04-21
				1899-12-31 07:10:00	Odocoileus	2.41502e+06	2010-04-21
				1899-12-31 16:07:00	Odocoileus	2.41502e+06	2010-04-21
				1899-12-31 12:31:00	Odocoileus	2.41502e+06	2010-04-21
				1899-12-31 09:34:00	Pecari	2.41502e+06	2010-04-21
				1899-12-31 12:23:00	Odocoileus	2.41502e+06	2010-04-22
				1899-12-31 10:30:00	Odocoileus	2.41502e+06	2010-04-22
				1899-12-31 07:51:00	Odocoileus	2.41502e+06	2010-04-22
				1899-12-31 12:21:00	Odocoileus	2.41502e+06	2010-04-22
				1899-12-31 17:31:00	Odocoileus	2.41502e+06	2010-04-23
				1899-12-31 16:35:00	Odocoileus	2.41502e+06	2010-04-23
				1899-12-31 12:22:00	Odocoileus	2.41502e+06	2010-04-23
				1899-12-31 13:45:00	Odocoileus	2.41502e+06	2010-04-23
				1899-12-31 15:09:00	Odocoileus	2.41502e+06	2010-04-23
				1899-12-31 16:12:00	Odocoileus	2.41502e+06	2010-04-23
				1899-12-31 08:05:00	Odocoileus	2.41502e+06	2010-04-23
				1899-12-31 11:22:00	Odocoileus	2.41502e+06	2010-04-23
				1899-12-31 10:42:00	Odocoileus	2.41502e+06	2010-04-23
				1899-12-31 13:35:00	Odocoileus	2.41502e+06	2010-04-24
				1899-12-31 11:24:00	Odocoileus	2.41502e+06	2010-04-24
				1899-12-31 10:47:00	Odocoileus	2.41502e+06	2010-04-24
				1899-12-31 10:19:00	Odocoileus	2.41502e+06	2010-04-24
				1899-12-31 06:46:00	Odocoileus	2.41502e+06	2010-04-24
				1899-12-31 09:14:00	Odocoileus	2.41502e+06	2010-04-24
				1899-12-31 07:56:00	Odocoileus	2.41502e+06	2010-04-24
				1899-12-31 06:10:00	Odocoileus	2.41502e+06	2010-04-24
				1899-12-31 22:43:00	Odocoileus	2.41502e+06	2010-04-24
				1899-12-31 22:43:00	Odocoileus	2.41502e+06	2010-04-24
				1899-12-31 23:06:00	Odocoileus	2.41502e+06	2010-04-24
				1899-12-31 23:06:00	Odocoileus	2.41502e+06	2010-04-24
				1899-12-31 10:19:00	Odocoileus	2.41502e+06	2010-04-24
				1899-12-31 09:42:00	Odocoileus	2.41502e+06	2010-04-25
				1899-12-31 07:55:00	Odocoileus	2.41502e+06	2010-04-25
				1899-12-31 10:21:00	Odocoileus	2.41502e+06	2010-04-25
				1899-12-31 07:04:00	Odocoileus	2.41502e+06	2010-04-25
				1899-12-31 00:41:00	Odocoileus	2.41502e+06	2010-04-25
				1899-12-31 08:44:00	Odocoileus	2.41502e+06	2010-04-25
				1899-12-31 07:42:00	Pecari	2.41502e+06	2010-04-25
				1899-12-31 03:59:00	Odocoileus	2.41502e+06	2010-04-26
				1899-12-31 17:49:00	Odocoileus	2.41502e+06	2010-04-26
				1899-12-31 07:46:00	Odocoileus	2.41502e+06	2010-04-26
				1899-12-31 09:52:00	Odocoileus	2.41502e+06	2010-04-26
				1899-12-31 10:22:00	Odocoileus	2.41502e+06	2010-04-27
				1899-12-31 13:51:00	Odocoileus	2.41502e+06	2010-04-27
				1899-12-31 13:51:00	Odocoileus	2.41502e+06	2010-04-27
				1899-12-31 04:48:00	Odocoileus	2.41502e+06	2010-04-27
				1899-12-31 07:04:00	Odocoileus	2.41502e+06	2010-04-27
				1899-12-31 07:54:00	Odocoileus	2.41502e+06	2010-04-27
				1899-12-31 11:55:00	Odocoileus	2.41502e+06	2010-04-28
				1899-12-31 07:19:00	Odocoileus	2.41502e+06	2010-04-28
				1899-12-31 09:34:00	Odocoileus	2.41502e+06	2010-04-28
				1899-12-31 02:00:00	Odocoileus	2.41502e+06	2010-04-29
				1899-12-31 09:39:00	Odocoileus	2.41502e+06	2010-04-29
				1899-12-31 10:18:00	Pecari	2.41502e+06	2010-04-29
				1899-12-31 03:55:00	Odocoileus	2.41502e+06	2010-04-29
				1899-12-31 10:09:00	Odocoileus	2.41502e+06	2010-04-29
				1899-12-31 14:35:00	Odocoileus	2.41502e+06	2010-04-29
				1899-12-31 10:40:00	Odocoileus	2.41502e+06	2010-05-01
				1899-12-31 17:47:00	Odocoileus	2.41502e+06	2010-05-01
				1899-12-31 16:29:00	Odocoileus	2.41502e+06	2010-05-02
				1899-12-31 09:54:00	Odocoileus	2.41502e+06	2010-05-02
				1899-12-31 17:26:00	Odocoileus	2.41502e+06	2010-05-02
				1899-12-31 07:04:00	Odocoileus	2.41502e+06	2010-05-02
				1899-12-31 19:06:00	Odocoileus	2.41502e+06	2010-05-02
				1899-12-31 09:13:00	Odocoileus	2.41502e+06	2010-05-03
				1899-12-31 19:35:00	Odocoileus	2.41502e+06	2010-05-03
				1899-12-31 09:33:00	Odocoileus	2.41502e+06	2010-05-03
				1899-12-31 09:33:00	Odocoileus	2.41502e+06	2010-05-03
				1899-12-31 09:33:00	Odocoileus	2.41502e+06	2010-05-03
				1899-12-31 13:00:00	Odocoileus	2.41502e+06	2010-05-03
				1899-12-31 00:46:00	Odocoileus	2.41502e+06	2010-05-03
				1899-12-31 15:08:00	Odocoileus	2.41502e+06	2010-05-04
				1899-12-31 10:23:00	Odocoileus	2.41502e+06	2010-05-05
				1899-12-31 15:28:00	Odocoileus	2.41502e+06	2010-05-05
				1899-12-31 22:36:00	Odocoileus	2.41502e+06	2010-05-06
				1899-12-31 09:55:00	Odocoileus	2.41502e+06	2010-05-06
				1899-12-31 11:33:00	Odocoileus	2.41502e+06	2010-05-06
				1899-12-31 07:27:00	Odocoileus	2.41502e+06	2010-05-06
				1899-12-31 07:27:00	Odocoileus	2.41502e+06	2010-05-06
				1899-12-31 07:28:00	Odocoileus	2.41502e+06	2010-05-06
				1899-12-31 07:28:00	Odocoileus	2.41502e+06	2010-05-06
				1899-12-31 18:21:00	Odocoileus	2.41502e+06	2010-05-07
				1899-12-31 11:56:00	Odocoileus	2.41502e+06	2010-05-07
				1899-12-31 11:56:00	Odocoileus	2.41502e+06	2010-05-07
				1899-12-31 18:42:00	Odocoileus	2.41502e+06	2010-05-08
				1899-12-31 06:21:00	Odocoileus	2.41502e+06	2010-05-08
				1899-12-31 14:45:00	Odocoileus	2.41502e+06	2010-05-09
				1899-12-31 07:50:00	Odocoileus	2.41502e+06	2010-05-09
				1899-12-31 17:03:00	Odocoileus	2.41502e+06	2011-04-01
				1899-12-31 09:31:00	Odocoileus	2.41502e+06	2011-04-01
				1899-12-31 07:52:00	Odocoileus	2.41502e+06	2011-04-01
				1899-12-31 21:02:00	Odocoileus	2.41502e+06	2011-04-01
				1899-12-31 12:29:00	Odocoileus	2.41502e+06	2011-04-01
				1899-12-31 12:29:00	Odocoileus	2.41502e+06	2011-04-01
				1899-12-31 15:39:00	Odocoileus	2.41502e+06	2011-04-02
				1899-12-31 21:17:00	Odocoileus	2.41502e+06	2011-04-02
				1899-12-31 07:21:00	Odocoileus	2.41502e+06	2011-04-02
				1899-12-31 05:57:00	Odocoileus	2.41502e+06	2011-04-02
				1899-12-31 08:15:00	Odocoileus	2.41502e+06	2011-04-02
				1899-12-31 07:21:00	Odocoileus	2.41502e+06	2011-04-02
				1899-12-31 10:19:00	Odocoileus	2.41502e+06	2011-04-02
				1899-12-31 10:19:00	Odocoileus	2.41502e+06	2011-04-02
				1899-12-31 09:32:00	Odocoileus	2.41502e+06	2011-04-03
				1899-12-31 09:41:00	Odocoileus	2.41502e+06	2011-04-03
				1899-12-31 08:11:00	Odocoileus	2.41502e+06	2011-04-03
				1899-12-31 09:16:00	Odocoileus	2.41502e+06	2011-04-03
				1899-12-31 12:47:00	Odocoileus	2.41502e+06	2011-04-03
				1899-12-31 07:53:00	Pecari	2.41502e+06	2011-04-03
				1899-12-31 07:53:00	Pecari	2.41502e+06	2011-04-03
				1899-12-31 07:09:00	Odocoileus	2.41502e+06	2011-04-04
				1899-12-31 07:09:00	Odocoileus	2.41502e+06	2011-04-04
				1899-12-31 09:17:00	Odocoileus	2.41502e+06	2011-04-04
				1899-12-31 13:35:00	Odocoileus	2.41502e+06	2011-04-05
				1899-12-31 09:42:00	Odocoileus	2.41502e+06	2011-04-05
				1899-12-31 21:23:00	Odocoileus	2.41502e+06	2011-04-05
				1899-12-31 15:03:00	Odocoileus	2.41502e+06	2011-04-05
				1899-12-31 09:13:00	Odocoileus	2.41502e+06	2011-04-05
				1899-12-31 11:04:00	Odocoileus	2.41502e+06	2011-04-05
				1899-12-31 19:07:00	Odocoileus	2.41502e+06	2011-04-06
				1899-12-31 16:42:00	Odocoileus	2.41502e+06	2011-04-06
				1899-12-31 19:00:00	Odocoileus	2.41502e+06	2011-04-06
				1899-12-31 18:14:00	Pecari	2.41502e+06	2011-04-06
				1899-12-31 18:14:00	Pecari	2.41502e+06	2011-04-06
				1899-12-31 00:13:00	Odocoileus	2.41502e+06	2011-04-06
				1899-12-31 07:41:00	Odocoileus	2.41502e+06	2011-04-06
				1899-12-31 18:22:00	Odocoileus	2.41502e+06	2011-04-06
				1899-12-31 07:30:00	Odocoileus	2.41502e+06	2011-04-07
				1899-12-31 04:20:00	Odocoileus	2.41502e+06	2011-04-07
				1899-12-31 13:10:00	Odocoileus	2.41502e+06	2011-04-07
				1899-12-31 15:03:00	Odocoileus	2.41502e+06	2011-04-07
				1899-12-31 08:25:00	Odocoileus	2.41502e+06	2011-04-07
				1899-12-31 07:42:00	Odocoileus	2.41502e+06	2011-04-07
				1899-12-31 16:40:00	Odocoileus	2.41502e+06	2011-04-08
				1899-12-31 16:40:00	Odocoileus	2.41502e+06	2011-04-08
				1899-12-31 14:11:00	Odocoileus	2.41502e+06	2011-04-08
				1899-12-31 07:13:00	Odocoileus	2.41502e+06	2011-04-08
				1899-12-31 00:16:00	Odocoileus	2.41502e+06	2011-04-08
				1899-12-31 15:10:00	Odocoileus	2.41502e+06	2011-04-09
				1899-12-31 20:49:00	Odocoileus	2.41502e+06	2011-04-09
				1899-12-31 11:08:00	Odocoileus	2.41502e+06	2011-04-09
				1899-12-31 08:14:00	Odocoileus	2.41502e+06	2011-04-10
				1899-12-31 09:25:00	Odocoileus	2.41502e+06	2011-04-10
				1899-12-31 07:55:00	Odocoileus	2.41502e+06	2011-04-10
				1899-12-31 14:22:00	Odocoileus	2.41502e+06	2011-04-10
				1899-12-31 16:33:00	Odocoileus	2.41502e+06	2011-04-10
				1899-12-31 05:43:00	Odocoileus	2.41502e+06	2011-04-10
				1899-12-31 12:56:00	Odocoileus	2.41502e+06	2011-04-11
				1899-12-31 11:03:00	Odocoileus	2.41502e+06	2011-04-11
				1899-12-31 15:42:00	Odocoileus	2.41502e+06	2011-04-11
				1899-12-31 16:29:00	Odocoileus	2.41502e+06	2011-04-11
				1899-12-31 21:44:00	Odocoileus	2.41502e+06	2011-04-11
				1899-12-31 07:54:00	Odocoileus	2.41502e+06	2011-04-11
				1899-12-31 13:57:00	Odocoileus	2.41502e+06	2011-04-11
				1899-12-31 11:46:00	Odocoileus	2.41502e+06	2011-04-11
				1899-12-31 07:12:00	Odocoileus	2.41502e+06	2011-04-11
				1899-12-31 08:11:00	Odocoileus	2.41502e+06	2011-04-11
				1899-12-31 10:30:00	Odocoileus	2.41502e+06	2011-04-11
				1899-12-31 10:30:00	Odocoileus	2.41502e+06	2011-04-11
				1899-12-31 12:53:00	Odocoileus	2.41502e+06	2011-04-11
				1899-12-31 07:03:00	Odocoileus	2.41502e+06	2011-04-12
				1899-12-31 09:51:00	Odocoileus	2.41502e+06	2011-04-12
				1899-12-31 10:02:00	Odocoileus	2.41502e+06	2011-04-12
				1899-12-31 14:41:00	Odocoileus	2.41502e+06	2011-04-12
				1899-12-31 07:42:00	Odocoileus	2.41502e+06	2011-04-12
				1899-12-31 14:36:00	Odocoileus	2.41502e+06	2011-04-12
				1899-12-31 04:45:00	Odocoileus	2.41502e+06	2011-04-12
				1899-12-31 10:28:00	Odocoileus	2.41502e+06	2011-04-12
				1899-12-31 09:21:00	Odocoileus	2.41502e+06	2011-04-12
				1899-12-31 18:25:00	Odocoileus	2.41502e+06	2011-04-12
				1899-12-31 18:25:00	Odocoileus	2.41502e+06	2011-04-12
				1899-12-31 08:10:00	Pecari	2.41502e+06	2011-04-13
				1899-12-31 08:54:00	Odocoileus	2.41502e+06	2011-04-13
				1899-12-31 07:54:00	Odocoileus	2.41502e+06	2011-04-13
				1899-12-31 17:58:00	Odocoileus	2.41502e+06	2011-04-13
				1899-12-31 09:13:00	Odocoileus	2.41502e+06	2011-04-14
				1899-12-31 08:51:00	Odocoileus	2.41502e+06	2011-04-14
				1899-12-31 11:45:00	Odocoileus	2.41502e+06	2011-04-14
				1899-12-31 08:18:00	Odocoileus	2.41502e+06	2011-04-14
				1899-12-31 08:18:00	Odocoileus	2.41502e+06	2011-04-14
				1899-12-31 11:44:00	Odocoileus	2.41502e+06	2011-04-14
				1899-12-31 16:13:00	Odocoileus	2.41502e+06	2011-04-14
				1899-12-31 10:11:00	Odocoileus	2.41502e+06	2011-04-15
				1899-12-31 10:11:00	Odocoileus	2.41502e+06	2011-04-15
				1899-12-31 14:49:00	Odocoileus	2.41502e+06	2011-04-15
				1899-12-31 09:01:00	Odocoileus	2.41502e+06	2011-04-15
				1899-12-31 07:44:00	Odocoileus	2.41502e+06	2011-04-15
				1899-12-31 16:10:00	Odocoileus	2.41502e+06	2011-04-15
				1899-12-31 08:51:00	Odocoileus	2.41502e+06	2011-04-15
				1899-12-31 15:03:00	Odocoileus	2.41502e+06	2011-04-15
				1899-12-31 09:50:00	Odocoileus	2.41502e+06	2011-04-15
				1899-12-31 21:06:00	Pecari	2.41502e+06	2011-04-15
				1899-12-31 08:42:00	Odocoileus	2.41502e+06	2011-04-16
				1899-12-31 11:45:00	Odocoileus	2.41502e+06	2011-04-16
				1899-12-31 16:38:00	Odocoileus	2.41502e+06	2011-04-16
				1899-12-31 10:56:00	Odocoileus	2.41502e+06	2011-04-16
				1899-12-31 08:38:00	Odocoileus	2.41502e+06	2011-04-16
				1899-12-31 16:58:00	Odocoileus	2.41502e+06	2011-04-16
				1899-12-31 07:23:00	Odocoileus	2.41502e+06	2011-04-16
				1899-12-31 07:23:00	Odocoileus	2.41502e+06	2011-04-16
				1899-12-31 23:22:00	Odocoileus	2.41502e+06	2011-04-16
				1899-12-31 13:46:00	Odocoileus	2.41502e+06	2011-04-16
				1899-12-31 04:56:00	Odocoileus	2.41502e+06	2011-04-16
				1899-12-31 07:54:00	Pecari	2.41502e+06	2011-04-16
				1899-12-31 16:22:00	Odocoileus	2.41502e+06	2011-04-17
				1899-12-31 08:16:00	Odocoileus	2.41502e+06	2011-04-17
				1899-12-31 16:35:00	Odocoileus	2.41502e+06	2011-04-17
				1899-12-31 08:45:00	Odocoileus	2.41502e+06	2011-04-17
				1899-12-31 08:45:00	Odocoileus	2.41502e+06	2011-04-17
				1899-12-31 08:28:00	Odocoileus	2.41502e+06	2011-04-17
				1899-12-31 14:27:00	Odocoileus	2.41502e+06	2011-04-17
				1899-12-31 09:27:00	Odocoileus	2.41502e+06	2011-04-17
				1899-12-31 11:09:00	Odocoileus	2.41502e+06	2011-04-17
				1899-12-31 10:56:00	Odocoileus	2.41502e+06	2011-04-17
				1899-12-31 10:56:00	Odocoileus	2.41502e+06	2011-04-17
				1899-12-31 10:56:00	Odocoileus	2.41502e+06	2011-04-17
				1899-12-31 12:37:00	Odocoileus	2.41502e+06	2011-04-17
				1899-12-31 16:16:00	Odocoileus	2.41502e+06	2011-04-18
				1899-12-31 14:46:00	Odocoileus	2.41502e+06	2011-04-18
				1899-12-31 23:20:00	Odocoileus	2.41502e+06	2011-04-18
				1899-12-31 09:21:00	Odocoileus	2.41502e+06	2011-04-18
				1899-12-31 11:27:00	Odocoileus	2.41502e+06	2011-04-18
				1899-12-31 09:18:00	Pecari	2.41502e+06	2011-04-18
				1899-12-31 10:55:00	Odocoileus	2.41502e+06	2011-04-18
				1899-12-31 09:36:00	Odocoileus	2.41502e+06	2011-04-18
				1899-12-31 17:04:00	Odocoileus	2.41502e+06	2011-04-19
				1899-12-31 10:51:00	Odocoileus	2.41502e+06	2011-04-19
				1899-12-31 13:28:00	Odocoileus	2.41502e+06	2011-04-19
				1899-12-31 09:46:00	Odocoileus	2.41502e+06	2011-04-19
				1899-12-31 21:50:00	Odocoileus	2.41502e+06	2011-04-19
				1899-12-31 08:58:00	Odocoileus	2.41502e+06	2011-04-19
				1899-12-31 10:07:00	Odocoileus	2.41502e+06	2011-04-19
				1899-12-31 09:35:00	Odocoileus	2.41502e+06	2011-04-20
				1899-12-31 09:44:00	Odocoileus	2.41502e+06	2011-04-20
				1899-12-31 15:43:00	Odocoileus	2.41502e+06	2011-04-20
				1899-12-31 01:19:00	Odocoileus	2.41502e+06	2011-04-20
				1899-12-31 06:04:00	Odocoileus	2.41502e+06	2011-04-20
				1899-12-31 00:30:00	Odocoileus	2.41502e+06	2011-04-20
				1899-12-31 18:10:00	Odocoileus	2.41502e+06	2011-04-20
				1899-12-31 10:01:00	Odocoileus	2.41502e+06	2011-04-20
				1899-12-31 09:08:00	Odocoileus	2.41502e+06	2011-04-20
				1899-12-31 11:08:00	Odocoileus	2.41502e+06	2011-04-20
				1899-12-31 09:52:00	Odocoileus	2.41502e+06	2011-04-21
				1899-12-31 14:29:00	Odocoileus	2.41502e+06	2011-04-21
				1899-12-31 16:43:00	Odocoileus	2.41502e+06	2011-04-21
				1899-12-31 11:53:00	Odocoileus	2.41502e+06	2011-04-21
				1899-12-31 07:39:00	Odocoileus	2.41502e+06	2011-04-21
				1899-12-31 08:55:00	Odocoileus	2.41502e+06	2011-04-21
				1899-12-31 12:38:00	Odocoileus	2.41502e+06	2011-04-21
				1899-12-31 11:13:00	Odocoileus	2.41502e+06	2011-04-21
				1899-12-31 09:55:00	Odocoileus	2.41502e+06	2011-04-22
				1899-12-31 12:07:00	Odocoileus	2.41502e+06	2011-04-22
				1899-12-31 17:42:00	Odocoileus	2.41502e+06	2011-04-22
				1899-12-31 20:32:00	Odocoileus	2.41502e+06	2011-04-22
				1899-12-31 18:06:00	Odocoileus	2.41502e+06	2011-04-22
				1899-12-31 17:12:00	Odocoileus	2.41502e+06	2011-04-22
				1899-12-31 05:23:00	Odocoileus	2.41502e+06	2011-04-22
				1899-12-31 13:42:00	Odocoileus	2.41502e+06	2011-04-22
				1899-12-31 16:44:00	Odocoileus	2.41502e+06	2011-04-22
				1899-12-31 13:46:00	Odocoileus	2.41502e+06	2011-04-22
				1899-12-31 14:48:00	Odocoileus	2.41502e+06	2011-04-23
				1899-12-31 11:07:00	Odocoileus	2.41502e+06	2011-04-23
				1899-12-31 07:56:00	Odocoileus	2.41502e+06	2011-04-23
				1899-12-31 12:20:00	Odocoileus	2.41502e+06	2011-04-23
				1899-12-31 07:27:00	Odocoileus	2.41502e+06	2011-04-23
				1899-12-31 11:34:00	Odocoileus	2.41502e+06	2011-04-23
				1899-12-31 11:09:00	Odocoileus	2.41502e+06	2011-04-23
				1899-12-31 14:58:00	Odocoileus	2.41502e+06	2011-04-24
				1899-12-31 14:58:00	Odocoileus	2.41502e+06	2011-04-24
				1899-12-31 09:43:00	Odocoileus	2.41502e+06	2011-04-24
				1899-12-31 15:14:00	Odocoileus	2.41502e+06	2011-04-24
				1899-12-31 15:14:00	Odocoileus	2.41502e+06	2011-04-24
				1899-12-31 22:04:00	Odocoileus	2.41502e+06	2011-04-24
				1899-12-31 22:05:00	Odocoileus	2.41502e+06	2011-04-24
				1899-12-31 15:18:00	Odocoileus	2.41502e+06	2011-04-24
				1899-12-31 10:03:00	Odocoileus	2.41502e+06	2011-04-25
				1899-12-31 09:29:00	Odocoileus	2.41502e+06	2011-04-25
				1899-12-31 16:48:00	Odocoileus	2.41502e+06	2011-04-25
				1899-12-31 13:14:00	Odocoileus	2.41502e+06	2011-04-25
				1899-12-31 10:03:00	Odocoileus	2.41502e+06	2011-04-25
				1899-12-31 11:12:00	Odocoileus	2.41502e+06	2011-04-25
				1899-12-31 11:12:00	Odocoileus	2.41502e+06	2011-04-25
				1899-12-31 09:06:00	Odocoileus	2.41502e+06	2011-04-25
				1899-12-31 10:00:00	Odocoileus	2.41502e+06	2011-04-25
				1899-12-31 10:00:00	Odocoileus	2.41502e+06	2011-04-25
				1899-12-31 01:26:00	Odocoileus	2.41502e+06	2011-04-26
				1899-12-31 08:08:00	Odocoileus	2.41502e+06	2011-04-26
				1899-12-31 17:12:00	Odocoileus	2.41502e+06	2011-04-26
				1899-12-31 12:22:00	Odocoileus	2.41502e+06	2011-04-26
				1899-12-31 20:23:00	Odocoileus	2.41502e+06	2011-04-26
				1899-12-31 12:47:00	Odocoileus	2.41502e+06	2011-04-26
				1899-12-31 06:12:00	Odocoileus	2.41502e+06	2011-04-26
				1899-12-31 01:33:00	Odocoileus	2.41502e+06	2011-04-26
				1899-12-31 01:33:00	Odocoileus	2.41502e+06	2011-04-26
				1899-12-31 10:50:00	Odocoileus	2.41502e+06	2011-04-27
				1899-12-31 02:41:00	Odocoileus	2.41502e+06	2011-04-27
				1899-12-31 14:04:00	Odocoileus	2.41502e+06	2011-04-27
				1899-12-31 16:57:00	Odocoileus	2.41502e+06	2011-04-27
				1899-12-31 05:30:00	Odocoileus	2.41502e+06	2011-04-27
				1899-12-31 18:19:00	Pecari	2.41502e+06	2011-04-27
				1899-12-31 00:06:00	Odocoileus	2.41502e+06	2011-04-28
				1899-12-31 09:59:00	Odocoileus	2.41502e+06	2011-04-28
				1899-12-31 10:27:00	Odocoileus	2.41502e+06	2011-04-28
				1899-12-31 12:48:00	Odocoileus	2.41502e+06	2011-04-28
				1899-12-31 13:51:00	Odocoileus	2.41502e+06	2011-04-28
				1899-12-31 07:40:00	Odocoileus	2.41502e+06	2011-04-28
				1899-12-31 11:20:00	Odocoileus	2.41502e+06	2011-04-28
				1899-12-31 08:21:00	Odocoileus	2.41502e+06	2011-04-28
				1899-12-31 15:57:00	Odocoileus	2.41502e+06	2011-04-28
				1899-12-31 11:36:00	Odocoileus	2.41502e+06	2011-04-28
				1899-12-31 13:36:00	Odocoileus	2.41502e+06	2011-04-28
				1899-12-31 10:16:00	Odocoileus	2.41502e+06	2011-04-28
				1899-12-31 11:37:00	Odocoileus	2.41502e+06	2011-04-28
				1899-12-31 11:18:00	Odocoileus	2.41502e+06	2011-04-28
				1899-12-31 13:12:00	Odocoileus	2.41502e+06	2011-04-28
				1899-12-31 16:00:00	Odocoileus	2.41502e+06	2011-04-29
				1899-12-31 17:46:00	Pecari	2.41502e+06	2011-04-29
				1899-12-31 10:35:00	Odocoileus	2.41502e+06	2011-04-29
				1899-12-31 09:15:00	Odocoileus	2.41502e+06	2011-04-29
				1899-12-31 12:38:00	Odocoileus	2.41502e+06	2011-04-29
				1899-12-31 22:15:00	Odocoileus	2.41502e+06	2011-04-29
				1899-12-31 02:35:00	Odocoileus	2.41502e+06	2011-04-30
				1899-12-31 08:27:00	Odocoileus	2.41502e+06	2011-04-30
				1899-12-31 09:45:00	Odocoileus	2.41502e+06	2011-04-30
				1899-12-31 16:08:00	Odocoileus	2.41502e+06	2011-04-30
				1899-12-31 22:42:00	Odocoileus	2.41502e+06	2011-04-30
				1899-12-31 07:43:00	Odocoileus	2.41502e+06	2011-04-30
				1899-12-31 08:46:00	Odocoileus	2.41502e+06	2011-04-30
				1899-12-31 11:45:00	Odocoileus	2.41502e+06	2011-04-30
				1899-12-31 17:20:00	Odocoileus	2.41502e+06	2011-04-30
				1899-12-31 10:55:00	Odocoileus	2.41502e+06	2011-04-30
				1899-12-31 15:18:00	Odocoileus	2.41502e+06	2011-04-30
				1899-12-31 12:14:00	Odocoileus	2.41502e+06	2011-04-30
				1899-12-31 12:14:00	Odocoileus	2.41502e+06	2011-04-30
				1899-12-31 02:01:00	Odocoileus	2.41502e+06	2011-05-01
				1899-12-31 11:34:00	Odocoileus	2.41502e+06	2011-05-01
				1899-12-31 17:45:00	Odocoileus	2.41502e+06	2011-05-01
				1899-12-31 08:04:00	Pecari	2.41502e+06	2011-05-01
				1899-12-31 08:04:00	Pecari	2.41502e+06	2011-05-01
				1899-12-31 09:52:00	Odocoileus	2.41502e+06	2011-05-01
				1899-12-31 05:15:00	Odocoileus	2.41502e+06	2011-05-01
				1899-12-31 16:34:00	Pecari	2.41502e+06	2011-05-01
				1899-12-31 10:21:00	Odocoileus	2.41502e+06	2012-02-28
				1899-12-31 06:12:00	Odocoileus	2.41502e+06	2012-02-28
				1899-12-31 20:36:00	Odocoileus	2.41502e+06	2012-02-28
				1899-12-31 13:16:00	Pecari	2.41502e+06	2012-02-29
				1899-12-31 13:16:00	Pecari	2.41502e+06	2012-02-29
				1899-12-31 13:16:00	Pecari	2.41502e+06	2012-02-29
				1899-12-31 14:31:00	Pecari	2.41502e+06	2012-02-29
				1899-12-31 11:22:00	Odocoileus	2.41502e+06	2012-02-29
				1899-12-31 13:16:00	Odocoileus	2.41502e+06	2012-02-29
				1899-12-31 10:00:00	Odocoileus	2.41502e+06	2012-03-01
				1899-12-31 10:00:00	Odocoileus	2.41502e+06	2012-03-01
				1899-12-31 08:45:00	Odocoileus	2.41502e+06	2012-03-02
				1899-12-31 10:24:00	Odocoileus	2.41502e+06	2012-03-02
				1899-12-31 20:18:00	Odocoileus	2.41502e+06	2012-03-02
				1899-12-31 09:22:00	Odocoileus	2.41502e+06	2012-03-03
				1899-12-31 11:16:00	Odocoileus	2.41502e+06	2012-03-03
				1899-12-31 23:53:00	Odocoileus	2.41502e+06	2012-03-03
				1899-12-31 07:55:00	Odocoileus	2.41502e+06	2012-03-04
				1899-12-31 09:51:00	Odocoileus	2.41502e+06	2012-03-04
				1899-12-31 06:28:00	Odocoileus	2.41502e+06	2012-03-04
				1899-12-31 10:37:00	Odocoileus	2.41502e+06	2012-03-05
				1899-12-31 10:37:00	Odocoileus	2.41502e+06	2012-03-05
				1899-12-31 07:14:00	Odocoileus	2.41502e+06	2012-03-05
				1899-12-31 15:55:00	Odocoileus	2.41502e+06	2012-03-05
				1899-12-31 17:19:00	Odocoileus	2.41502e+06	2012-03-06
				1899-12-31 17:35:00	Pecari	2.41502e+06	2012-03-06
				1899-12-31 16:35:00	Odocoileus	2.41502e+06	2012-03-06
				1899-12-31 12:39:00	Odocoileus	2.41502e+06	2012-03-06
				1899-12-31 21:15:00	Odocoileus	2.41502e+06	2012-03-06
				1899-12-31 10:39:00	Odocoileus	2.41502e+06	2012-03-06
				1899-12-31 21:56:00	Odocoileus	2.41502e+06	2012-03-06
				1899-12-31 18:14:00	Odocoileus	2.41502e+06	2012-03-06
				1899-12-31 02:47:00	Odocoileus	2.41502e+06	2012-03-06
				1899-12-31 18:02:00	Pecari	2.41502e+06	2012-03-07
				1899-12-31 18:02:00	Pecari	2.41502e+06	2012-03-07
				1899-12-31 11:28:00	Pecari	2.41502e+06	2012-03-07
				1899-12-31 09:18:00	Odocoileus	2.41502e+06	2012-03-07
				1899-12-31 14:20:00	Odocoileus	2.41502e+06	2012-03-07
				1899-12-31 03:10:00	Odocoileus	2.41502e+06	2012-03-07
				1899-12-31 08:28:00	Odocoileus	2.41502e+06	2012-03-07
				1899-12-31 10:59:00	Odocoileus	2.41502e+06	2012-03-08
				1899-12-31 11:33:00	Odocoileus	2.41502e+06	2012-03-08
				1899-12-31 22:24:00	Odocoileus	2.41502e+06	2012-03-08
				1899-12-31 03:01:00	Odocoileus	2.41502e+06	2012-03-09
				1899-12-31 09:23:00	Pecari	2.41502e+06	2012-03-09
				1899-12-31 22:02:00	Odocoileus	2.41502e+06	2012-03-09
				1899-12-31 01:34:00	Odocoileus	2.41502e+06	2012-03-09
				1899-12-31 19:17:00	Odocoileus	2.41502e+06	2012-03-09
				1899-12-31 09:19:00	Odocoileus	2.41502e+06	2012-03-10
				1899-12-31 11:41:00	Odocoileus	2.41502e+06	2012-03-10
				1899-12-31 11:41:00	Odocoileus	2.41502e+06	2012-03-10
				1899-12-31 09:51:00	Odocoileus	2.41502e+06	2012-03-10
				1899-12-31 15:52:00	Odocoileus	2.41502e+06	2012-03-11
				1899-12-31 10:08:00	Odocoileus	2.41502e+06	2012-03-11
				1899-12-31 12:24:00	Odocoileus	2.41502e+06	2012-03-11
				1899-12-31 09:44:00	Odocoileus	2.41502e+06	2012-03-11
				1899-12-31 10:47:00	Odocoileus	2.41502e+06	2012-03-11
				1899-12-31 17:37:00	Pecari	2.41502e+06	2012-03-12
				1899-12-31 21:45:00	Odocoileus	2.41502e+06	2012-03-12
				1899-12-31 08:16:00	Odocoileus	2.41502e+06	2012-03-12
				1899-12-31 17:52:00	Odocoileus	2.41502e+06	2012-03-12
				1899-12-31 20:02:00	Odocoileus	2.41502e+06	2012-03-12
				1899-12-31 10:00:00	Odocoileus	2.41502e+06	2012-03-12
				1899-12-31 12:28:00	Odocoileus	2.41502e+06	2012-03-12
				1899-12-31 13:00:00	Odocoileus	2.41502e+06	2012-03-13
				1899-12-31 07:48:00	Odocoileus	2.41502e+06	2012-03-13
				1899-12-31 10:08:00	Odocoileus	2.41502e+06	2012-03-13
				1899-12-31 11:18:00	Odocoileus	2.41502e+06	2012-03-13
				1899-12-31 09:39:00	Odocoileus	2.41502e+06	2012-03-14
				1899-12-31 00:57:00	Odocoileus	2.41502e+06	2012-03-14
				1899-12-31 18:39:00	Odocoileus	2.41502e+06	2012-03-14
				1899-12-31 08:37:00	Odocoileus	2.41502e+06	2012-03-15
				1899-12-31 08:37:00	Odocoileus	2.41502e+06	2012-03-15
				1899-12-31 13:05:00	Odocoileus	2.41502e+06	2012-03-15
				1899-12-31 02:53:00	Odocoileus	2.41502e+06	2012-03-15
				1899-12-31 05:03:00	Odocoileus	2.41502e+06	2012-03-15
				1899-12-31 18:58:00	Odocoileus	2.41502e+06	2012-03-16
				1899-12-31 02:48:00	Odocoileus	2.41502e+06	2012-03-16
				1899-12-31 04:04:00	Odocoileus	2.41502e+06	2012-03-16
				1899-12-31 11:17:00	Odocoileus	2.41502e+06	2012-03-16
				1899-12-31 09:53:00	Odocoileus	2.41502e+06	2012-03-16
				1899-12-31 09:38:00	Odocoileus	2.41502e+06	2012-03-17
				1899-12-31 14:41:00	Pecari	2.41502e+06	2012-03-17
				1899-12-31 14:41:00	Pecari	2.41502e+06	2012-03-17
				1899-12-31 15:16:00	Odocoileus	2.41502e+06	2012-03-17
				1899-12-31 22:19:00	Odocoileus	2.41502e+06	2012-03-17
				1899-12-31 22:19:00	Odocoileus	2.41502e+06	2012-03-17
				1899-12-31 09:52:00	Odocoileus	2.41502e+06	2012-03-17
				1899-12-31 00:56:00	Odocoileus	2.41502e+06	2012-03-18
				1899-12-31 11:15:00	Odocoileus	2.41502e+06	2012-03-19
				1899-12-31 22:45:00	Odocoileus	2.41502e+06	2012-03-19
				1899-12-31 12:34:00	Odocoileus	2.41502e+06	2012-03-19
				1899-12-31 09:02:00	Odocoileus	2.41502e+06	2012-03-19
				1899-12-31 09:02:00	Odocoileus	2.41502e+06	2012-03-19
				1899-12-31 06:54:00	Odocoileus	2.41502e+06	2012-03-19
				1899-12-31 06:54:00	Odocoileus	2.41502e+06	2012-03-19
				1899-12-31 19:47:00	Odocoileus	2.41502e+06	2012-03-19
				1899-12-31 17:25:00	Pecari	2.41502e+06	2012-03-20
				1899-12-31 13:57:00	Odocoileus	2.41502e+06	2012-03-20
				1899-12-31 22:12:00	Odocoileus	2.41502e+06	2012-03-20
				1899-12-31 08:32:00	Odocoileus	2.41502e+06	2012-03-21
				1899-12-31 01:18:00	Odocoileus	2.41502e+06	2012-03-21
				1899-12-31 08:22:00	Odocoileus	2.41502e+06	2012-03-21
				1899-12-31 11:41:00	Odocoileus	2.41502e+06	2012-03-21
				1899-12-31 11:29:00	Odocoileus	2.41502e+06	2012-03-22
				1899-12-31 12:45:00	Odocoileus	2.41502e+06	2012-03-22
				1899-12-31 08:25:00	Odocoileus	2.41502e+06	2012-03-23
				1899-12-31 14:13:00	Odocoileus	2.41502e+06	2012-03-23
				1899-12-31 09:15:00	Odocoileus	2.41502e+06	2012-03-23
				1899-12-31 02:17:00	Odocoileus	2.41502e+06	2012-03-23
				1899-12-31 19:37:00	Pecari	2.41502e+06	2012-03-23
				1899-12-31 09:02:00	Odocoileus	2.41502e+06	2012-03-24
				1899-12-31 09:02:00	Odocoileus	2.41502e+06	2012-03-24
				1899-12-31 20:40:00	Odocoileus	2.41502e+06	2012-03-24
				1899-12-31 17:00:00	Pecari	2.41502e+06	2012-03-24
				1899-12-31 17:00:00	Pecari	2.41502e+06	2012-03-24
				1899-12-31 09:10:00	Odocoileus	2.41502e+06	2012-03-24
				1899-12-31 10:31:00	Odocoileus	2.41502e+06	2012-03-24
				1899-12-31 02:08:00	Odocoileus	2.41502e+06	2012-03-25
				1899-12-31 11:09:00	Odocoileus	2.41502e+06	2012-03-25
				1899-12-31 12:18:00	Odocoileus	2.41502e+06	2012-03-25
				1899-12-31 07:44:00	Odocoileus	2.41502e+06	2012-03-25
				1899-12-31 10:28:00	Odocoileus	2.41502e+06	2012-03-25
				1899-12-31 10:28:00	Odocoileus	2.41502e+06	2012-03-25
				1899-12-31 03:15:00	Odocoileus	2.41502e+06	2012-03-26
				1899-12-31 07:48:00	Odocoileus	2.41502e+06	2012-03-26
				1899-12-31 07:48:00	Odocoileus	2.41502e+06	2012-03-26
				1899-12-31 10:24:00	Odocoileus	2.41502e+06	2012-03-26
				1899-12-31 08:54:00	Odocoileus	2.41502e+06	2012-03-26
				1899-12-31 08:54:00	Odocoileus	2.41502e+06	2012-03-26
				1899-12-31 14:21:00	Odocoileus	2.41502e+06	2012-03-27
				1899-12-31 07:33:00	Pecari	2.41502e+06	2012-03-27
				1899-12-31 07:33:00	Pecari	2.41502e+06	2012-03-27
				1899-12-31 08:20:00	Odocoileus	2.41502e+06	2012-03-27
				1899-12-31 10:06:00	Odocoileus	2.41502e+06	2012-03-27
				1899-12-31 01:22:00	Odocoileus	2.41502e+06	2012-03-27
				1899-12-31 10:51:00	Odocoileus	2.41502e+06	2012-03-28
				1899-12-31 07:56:00	Odocoileus	2.41502e+06	2012-03-28
				1899-12-31 08:09:00	Odocoileus	2.41502e+06	2012-03-28
				1899-12-31 07:54:00	Odocoileus	2.41502e+06	2012-03-28
				1899-12-31 10:01:00	Odocoileus	2.41502e+06	2012-03-28
				1899-12-31 06:04:00	Odocoileus	2.41502e+06	2012-03-28
				1899-12-31 15:34:00	Bos	2.41502e+06	2009-04-08
				1899-12-31 21:44:00	Bos	2.41502e+06	2010-05-02
				1899-12-31 15:05:00	Bos	2.41502e+06	2010-05-03
				1899-12-31 21:39:00	Bos	2.41502e+06	2012-02-28
				1899-12-31 10:25:00	Bos	2.41502e+06	2012-02-29
				1899-12-31 11:40:00	Bos	2.41502e+06	2012-03-11
				1899-12-31 17:24:00	Bos	2.41502e+06	2010-04-22
				1899-12-31 17:51:00	Bos	2.41502e+06	2010-04-30
				1899-12-31 09:49:00	Bos	2.41502e+06	2010-05-01
				1899-12-31 20:25:00	Bos	2.41502e+06	2010-05-05
				1899-12-31 14:54:00	Bos	2.41502e+06	2010-05-06
				1899-12-31 09:46:00	Bos	2.41502e+06	2010-05-07
				1899-12-31 07:47:00	Bos	2.41502e+06	2009-03-29
				1899-12-31 08:49:00	Bos	2.41502e+06	2009-03-29
				1899-12-31 15:50:00	Bos	2.41502e+06	2012-03-20
				1899-12-31 00:27:00	Bos	2.41502e+06	2012-03-26
				1899-12-31 09:43:00	Bos	2.41502e+06	2012-03-26
				1899-12-31 17:13:00	Bos	2.41502e+06	2012-03-26
				1899-12-31 06:20:00	Bos	2.41502e+06	2012-03-27
				1899-12-31 19:46:00	Bos	2.41502e+06	2012-03-27
				1899-12-31 09:05:00	Bos	2.41502e+06	2012-03-28
				1899-12-31 18:37:00	Bos	2.41502e+06	2010-04-22
				1899-12-31 08:47:00	Bos	2.41502e+06	2010-05-04
				1899-12-31 08:47:00	Bos	2.41502e+06	2010-05-04
				1899-12-31 08:53:00	Bos	2.41502e+06	2010-04-29
				1899-12-31 19:01:00	Bos	2.41502e+06	2011-04-14
				1899-12-31 17:28:00	Bos	2.41502e+06	2011-04-16
				1899-12-31 18:28:00	Bos	2.41502e+06	2009-03-12
				1899-12-31 18:28:00	Bos	2.41502e+06	2009-03-12
				1899-12-31 18:28:00	Bos	2.41502e+06	2009-03-12
				1899-12-31 07:45:00	Bos	2.41502e+06	2009-04-04
				1899-12-31 11:12:00	Bos	2.41502e+06	2009-04-04
				1899-12-31 17:20:00	Bos	2.41502e+06	2009-03-31
				1899-12-31 12:36:00	Bos	2.41502e+06	2012-03-20
				1899-12-31 16:33:00	Bos	2.41502e+06	2012-03-21
				1899-12-31 12:58:00	Bos	2.41502e+06	2012-03-26
				1899-12-31 17:08:00	Bos	2.41502e+06	2010-04-16
				1899-12-31 07:29:00	Bos	2.41502e+06	2010-05-04
				1899-12-31 05:57:00	Bos	2.41502e+06	2010-05-09
				1899-12-31 19:53:00	Bos	2.41502e+06	2011-04-13
				1899-12-31 23:43:00	Bos	2.41502e+06	2011-04-13
				1899-12-31 01:01:00	Bos	2.41502e+06	2011-04-14
				1899-12-31 05:24:00	Bos	2.41502e+06	2011-04-14
				1899-12-31 05:24:00	Bos	2.41502e+06	2011-04-14
				1899-12-31 05:24:00	Bos	2.41502e+06	2011-04-14
				1899-12-31 01:18:00	Bos	2.41502e+06	2011-04-17
				1899-12-31 05:26:00	Bos	2.41502e+06	2011-04-17
				1899-12-31 18:47:00	Bos	2.41502e+06	2011-04-22
				1899-12-31 18:52:00	Bos	2.41502e+06	2010-04-25
				1899-12-31 18:07:00	Bos	2.41502e+06	2011-04-26
				1899-12-31 14:54:00	Bos	2.41502e+06	2011-04-27
				1899-12-31 06:10:00	Bos	2.41502e+06	2011-05-01
				1899-12-31 07:00:00	Bos	2.41502e+06	2011-04-10
				1899-12-31 15:58:00	Bos	2.41502e+06	2011-04-21
				1899-12-31 14:54:00	Bos	2.41502e+06	2011-04-22
				1899-12-31 06:36:00	Bos	2.41502e+06	2011-04-07
				1899-12-31 17:57:00	Bos	2.41502e+06	2012-03-14
				1899-12-31 08:20:00	Bos	2.41502e+06	2012-03-15
				1899-12-31 05:46:00	Bos	2.41502e+06	2012-03-24
				1899-12-31 08:15:00	Bos	2.41502e+06	2011-04-09
				1899-12-31 10:37:00	Bos	2.41502e+06	2011-04-09
				1899-12-31 07:25:00	Bos	2.41502e+06	2011-04-10
				1899-12-31 10:41:00	Bos	2.41502e+06	2011-04-10
				1899-12-31 12:00:00	Bos	2.41502e+06	2011-04-10
				1899-12-31 16:32:00	Bos	2.41502e+06	2011-04-27
				1899-12-31 17:31:00	Bos	2.41502e+06	2011-04-25
				1899-12-31 07:43:00	Bos	2.41502e+06	2011-04-02
				1899-12-31 17:29:00	Bos	2.41502e+06	2011-04-04
				1899-12-31 23:37:00	Bos	2.41502e+06	2011-04-04
				1899-12-31 17:51:00	Bos	2.41502e+06	2011-04-07
				1899-12-31 18:41:00	Bos	2.41502e+06	2011-04-07
				1899-12-31 15:58:00	Bos	2.41502e+06	2011-04-08
				1899-12-31 18:37:00	Bos	2.41502e+06	2011-04-12
				1899-12-31 23:12:00	Bos	2.41502e+06	2011-04-16
				1899-12-31 05:45:00	Bos	2.41502e+06	2011-04-17
				1899-12-31 15:45:00	Bos	2.41502e+06	2011-04-17
				1899-12-31 15:45:00	Bos	2.41502e+06	2011-04-17
				1899-12-31 16:22:00	Bos	2.41502e+06	2011-04-18
				1899-12-31 20:01:00	Bos	2.41502e+06	2011-04-18
				1899-12-31 02:35:00	Bos	2.41502e+06	2011-04-19
				1899-12-31 17:59:00	Bos	2.41502e+06	2011-04-19
				1899-12-31 15:48:00	Bos	2.41502e+06	2011-04-20
				1899-12-31 19:27:00	Bos	2.41502e+06	2011-04-20
				1899-12-31 00:22:00	Bos	2.41502e+06	2011-04-21
				1899-12-31 09:10:00	Bos	2.41502e+06	2011-04-21
				1899-12-31 22:52:00	Bos	2.41502e+06	2011-04-21
				1899-12-31 22:52:00	Bos	2.41502e+06	2011-04-21
				1899-12-31 09:05:00	Bos	2.41502e+06	2011-04-22
				1899-12-31 09:05:00	Bos	2.41502e+06	2011-04-22
				1899-12-31 15:18:00	Bos	2.41502e+06	2011-04-22
				1899-12-31 16:58:00	Bos	2.41502e+06	2011-04-22
				1899-12-31 18:17:00	Bos	2.41502e+06	2011-04-24
				1899-12-31 18:31:00	Bos	2.41502e+06	2011-04-26
				1899-12-31 18:04:00	Bos	2.41502e+06	2011-04-27
				1899-12-31 08:01:00	Bos	2.41502e+06	2011-04-28
				1899-12-31 16:19:00	Bos	2.41502e+06	2011-04-28
				1899-12-31 08:15:00	Bos	2.41502e+06	2011-04-29
				1899-12-31 17:56:00	Bos	2.41502e+06	2011-04-30
				1899-12-31 08:43:00	Bos	2.41502e+06	2011-05-01
				1899-12-31 14:19:00	Bos	2.41502e+06	2011-05-01
				1899-12-31 15:43:00	Bos	2.41502e+06	2011-05-01
				1899-12-31 17:33:00	Bos	2.41502e+06	2011-05-01
				1899-12-31 17:23:00	Bos	2.41502e+06	2012-03-17
				1899-12-31 16:49:00	Bos	2.41502e+06	2012-03-23
				1899-12-31 08:38:00	Bos	2.41502e+06	2011-04-04
				1899-12-31 09:49:00	Bos	2.41502e+06	2011-04-04
				1899-12-31 08:04:00	Bos	2.41502e+06	2010-04-11
				1899-12-31 10:28:00	Bos	2.41502e+06	2010-04-30
				1899-12-31 16:58:00	Bos	2.41502e+06	2009-04-05
				1899-12-31 02:13:00	Bos	2.41502e+06	2012-02-29
				1899-12-31 13:50:00	Bos	2.41502e+06	2009-03-20
				1899-12-31 13:31:00	Bos	2.41502e+06	2009-03-26
				1899-12-31 06:20:00	Bos	2.41502e+06	2011-04-18
				1899-12-31 06:20:00	Bos	2.41502e+06	2011-04-18
				1899-12-31 19:13:00	Bos	2.41502e+06	2009-04-01
				1899-12-31 19:13:00	Bos	2.41502e+06	2009-04-01
				1899-12-31 09:14:00	Bos	2.41502e+06	2009-04-07
				1899-12-31 11:58:00	Bos	2.41502e+06	2011-04-15
				1899-12-31 19:52:00	Bos	2.41502e+06	2010-05-01
				1899-12-31 01:47:00	Bos	2.41502e+06	2010-05-03
				1899-12-31 13:46:00	Bos	2.41502e+06	2010-05-03
				1899-12-31 19:43:00	Bos	2.41502e+06	2010-05-06
				1899-12-31 16:08:00	Bos	2.41502e+06	2010-05-08
				1899-12-31 00:59:00	Bos	2.41502e+06	2011-04-01
				1899-12-31 07:59:00	Bos	2.41502e+06	2011-04-01
				1899-12-31 08:16:00	Bos	2.41502e+06	2011-04-02
				1899-12-31 19:24:00	Bos	2.41502e+06	2011-04-02
				1899-12-31 07:37:00	Bos	2.41502e+06	2011-04-03
				1899-12-31 17:39:00	Bos	2.41502e+06	2011-04-03
				1899-12-31 10:11:00	Bos	2.41502e+06	2011-04-04
				1899-12-31 08:31:00	Bos	2.41502e+06	2011-04-05
				1899-12-31 08:31:00	Bos	2.41502e+06	2011-04-05
				1899-12-31 09:43:00	Bos	2.41502e+06	2011-04-05
				1899-12-31 13:20:00	Bos	2.41502e+06	2011-04-05
				1899-12-31 18:38:00	Bos	2.41502e+06	2011-04-06
				1899-12-31 09:50:00	Bos	2.41502e+06	2011-04-07
				1899-12-31 16:34:00	Bos	2.41502e+06	2011-04-07
				1899-12-31 10:26:00	Bos	2.41502e+06	2011-04-08
				1899-12-31 10:26:00	Bos	2.41502e+06	2011-04-08
				1899-12-31 16:14:00	Bos	2.41502e+06	2011-04-08
				1899-12-31 07:49:00	Bos	2.41502e+06	2011-04-09
				1899-12-31 08:45:00	Bos	2.41502e+06	2011-04-10
				1899-12-31 10:36:00	Bos	2.41502e+06	2011-04-10
				1899-12-31 16:10:00	Bos	2.41502e+06	2011-04-10
				1899-12-31 18:10:00	Bos	2.41502e+06	2011-04-10
				1899-12-31 18:10:00	Bos	2.41502e+06	2011-04-10
				1899-12-31 08:16:00	Bos	2.41502e+06	2011-04-11
				1899-12-31 09:17:00	Bos	2.41502e+06	2011-04-11
				1899-12-31 10:39:00	Bos	2.41502e+06	2011-04-11
				1899-12-31 14:29:00	Bos	2.41502e+06	2011-04-11
				1899-12-31 16:21:00	Bos	2.41502e+06	2011-04-11
				1899-12-31 18:17:00	Bos	2.41502e+06	2011-04-11
				1899-12-31 10:14:00	Bos	2.41502e+06	2011-04-12
				1899-12-31 12:34:00	Bos	2.41502e+06	2011-04-12
				1899-12-31 17:24:00	Bos	2.41502e+06	2011-04-12
				1899-12-31 19:35:00	Bos	2.41502e+06	2011-04-12
				1899-12-31 01:12:00	Bos	2.41502e+06	2011-04-13
				1899-12-31 07:26:00	Bos	2.41502e+06	2011-04-13
				1899-12-31 09:53:00	Bos	2.41502e+06	2011-04-13
				1899-12-31 19:30:00	Bos	2.41502e+06	2011-04-13
				1899-12-31 19:30:00	Bos	2.41502e+06	2011-04-13
				1899-12-31 08:11:00	Bos	2.41502e+06	2011-04-14
				1899-12-31 09:44:00	Bos	2.41502e+06	2011-04-14
				1899-12-31 13:35:00	Bos	2.41502e+06	2011-04-14
				1899-12-31 17:07:00	Bos	2.41502e+06	2011-04-15
				1899-12-31 08:12:00	Bos	2.41502e+06	2011-04-16
				1899-12-31 10:01:00	Bos	2.41502e+06	2011-04-16
				1899-12-31 12:06:00	Bos	2.41502e+06	2011-04-16
				1899-12-31 16:32:00	Bos	2.41502e+06	2011-04-16
				1899-12-31 07:55:00	Bos	2.41502e+06	2011-04-17
				1899-12-31 18:03:00	Bos	2.41502e+06	2011-04-17
				1899-12-31 10:03:00	Bos	2.41502e+06	2011-04-18
				1899-12-31 17:04:00	Bos	2.41502e+06	2011-04-18
				1899-12-31 16:08:00	Bos	2.41502e+06	2011-04-19
				1899-12-31 19:51:00	Bos	2.41502e+06	2011-04-19
				1899-12-31 10:20:00	Bos	2.41502e+06	2011-04-20
				1899-12-31 16:43:00	Bos	2.41502e+06	2011-04-20
				1899-12-31 23:26:00	Bos	2.41502e+06	2011-04-20
				1899-12-31 09:36:00	Bos	2.41502e+06	2011-04-21
				1899-12-31 09:59:00	Bos	2.41502e+06	2011-04-22
				1899-12-31 13:21:00	Bos	2.41502e+06	2011-04-22
				1899-12-31 16:54:00	Bos	2.41502e+06	2011-04-22
				1899-12-31 21:43:00	Bos	2.41502e+06	2011-04-22
				1899-12-31 11:26:00	Bos	2.41502e+06	2011-04-23
				1899-12-31 11:26:00	Bos	2.41502e+06	2011-04-23
				1899-12-31 19:23:00	Bos	2.41502e+06	2011-04-23
				1899-12-31 07:57:00	Bos	2.41502e+06	2011-04-24
				1899-12-31 09:36:00	Bos	2.41502e+06	2011-04-24
				1899-12-31 17:36:00	Bos	2.41502e+06	2011-04-24
				1899-12-31 09:30:00	Bos	2.41502e+06	2011-04-25
				1899-12-31 16:53:00	Bos	2.41502e+06	2011-04-25
				1899-12-31 21:48:00	Bos	2.41502e+06	2011-04-25
				1899-12-31 09:56:00	Bos	2.41502e+06	2011-04-26
				1899-12-31 09:56:00	Bos	2.41502e+06	2011-04-26
				1899-12-31 14:26:00	Bos	2.41502e+06	2011-04-26
				1899-12-31 16:33:00	Bos	2.41502e+06	2011-04-26
				1899-12-31 08:28:00	Bos	2.41502e+06	2011-04-27
				1899-12-31 08:20:00	Bos	2.41502e+06	2011-04-28
				1899-12-31 07:56:00	Bos	2.41502e+06	2012-03-11
				1899-12-31 10:32:00	Bos	2.41502e+06	2012-03-11
				1899-12-31 13:20:00	Bos	2.41502e+06	2012-03-11
				1899-12-31 22:57:00	Bos	2.41502e+06	2012-03-11
				1899-12-31 06:30:00	Bos	2.41502e+06	2012-03-14
				1899-12-31 17:28:00	Bos	2.41502e+06	2012-03-14
				1899-12-31 15:10:00	Bos	2.41502e+06	2012-03-16
				1899-12-31 17:10:00	Bos	2.41502e+06	2012-03-16
				1899-12-31 09:13:00	Bos	2.41502e+06	2012-03-19
				1899-12-31 11:11:00	Bos	2.41502e+06	2012-03-20
				1899-12-31 16:31:00	Bos	2.41502e+06	2012-03-20
				1899-12-31 16:39:00	Bos	2.41502e+06	2012-03-21
				1899-12-31 08:30:00	Bos	2.41502e+06	2012-03-22
				1899-12-31 17:15:00	Bos	2.41502e+06	2012-03-22
				1899-12-31 17:45:00	Bos	2.41502e+06	2012-03-23
				1899-12-31 07:08:00	Bos	2.41502e+06	2012-03-24
				1899-12-31 17:48:00	Bos	2.41502e+06	2012-03-26
				1899-12-31 17:11:00	Bos	2.41502e+06	2012-03-28
				1899-12-31 15:21:00	Bos	2.41502e+06	2011-04-25
				1899-12-31 10:54:00	Bos	2.41502e+06	2011-04-10
				1899-12-31 12:58:00	Bos	2.41502e+06	2010-04-27
				1899-12-31 09:11:00	Bos	2.41502e+06	2010-04-29
				1899-12-31 13:02:00	Bos	2.41502e+06	2011-04-03
				1899-12-31 17:20:00	Bos	2.41502e+06	2011-04-05
				1899-12-31 18:57:00	Bos	2.41502e+06	2011-04-10
				1899-12-31 08:14:00	Bos	2.41502e+06	2011-04-12
				1899-12-31 06:35:00	Bos	2.41502e+06	2011-04-19
